1 Infection with novel *Bacteroides phage BV01* alters host transcriptome and bile acid  
2 metabolism in a common human gut microbe

3

4 Danielle E. Campbell<sup>a#</sup>, Lindsey K. Ly<sup>b,c</sup>, Jason M. Ridlon<sup>b,c,d</sup>, Ansel Hsiao<sup>e</sup>, Rachel J.  
5 Whitaker<sup>a,d</sup>, Patrick H. Degnan<sup>a,e</sup>

6

7 <sup>a</sup>Department of Microbiology, University of Illinois, Urbana, Illinois, USA

8 <sup>b</sup>Division of Nutritional Sciences, University of Illinois, Urbana, Illinois, USA

9 <sup>c</sup>Department of Animal Sciences, University of Illinois, Urbana, Illinois, USA

10 <sup>d</sup>Carl R. Woese Institute for Genomic Biology, University of Illinois, Urbana, Illinois,  
11 USA

12 <sup>e</sup>Department of Microbiology and Plant Pathology, University of California, Riverside,  
13 California, USA

14

15 Running Head: Prophage BV01 alters transcriptome and bile metabolism

16

17 <sup>#</sup>Address correspondence to Danielle E. Campbell, [campbe28@illinois.edu](mailto:campbe28@illinois.edu)

18

19 Abstract Word Count: 233

20 Text Word Count: 6552

21

22

23

24 **ABSTRACT**

25 The bacterial genus *Bacteroides* is among the most abundant and common taxa in the  
26 human gut, yet little is known about the phages infecting the group. *Bacteroides phage*  
27 *BV01* (BV01) was identified as a prophage integrated on the chromosome of its host,  
28 *Bacteroides vulgatus* ATCC 8482. Phage BV01 is actively produced, and infects  
29 susceptible *B. vulgatus* hosts in the mouse gut. Infection with BV01 causes a generalized  
30 repression of the *B. vulgatus* transcriptome, downregulating 103 transcripts and  
31 upregulating only 12. Integration of BV01 disrupts the promoter sequence of a  
32 downstream gene encoding a putative tryptophan-rich sensory protein (*tspO*). Deletion of  
33 *tspO* and subsequent RNAseq analysis revealed that more than half of the differentially-  
34 regulated transcripts are shared with the BV01 lysogen, suggesting the transcriptomic  
35 response to BV01 is linked to *tspO*. Among these differentially-regulated transcripts are  
36 two encoding bile salt hydrolases. Bile acid deconjugation assays show that BV01  
37 represses its host's ability to hydrolyze bile acids in a *tspO*-dependent manner. Analysis  
38 of 256 published healthy human gut metagenomes suggests that phage integration  
39 adjacent to *B. vulgatus*-like *tspO* genes is rare within an individual, but common among  
40 humans. Finally, this work proposes a novel phage family that includes BV01, the  
41 *Salyersviridae*, whose host range spans the *Bacteroides* and is detectable in human-  
42 associated samples. Together, these findings highlight the importance of phage-host  
43 interactions to our understanding of how gut microbes sense and interact with their  
44 environment.

45

46 **IMPORTANCE**

47 The links between human disease and the gut microbiome are numerous. Most  
48 mechanisms by which most gut microbes and their activities change and impact human  
49 health remain elusive. Phages, viruses that infect bacteria, are hypothesized to play a  
50 central role in modulating both community dynamics and functional activities. Here we  
51 have characterized an active prophage, BV01, which infects a pervasive and abundant  
52 human gut-associated species. BV01 infection alters its host's transcriptional profile  
53 including its metabolism of bile acids, molecules implicated in mediating health and  
54 disease states in the gut. This highlights that prophages and other components of the  
55 variable genome should not be overlooked in bacterial genomes because they may  
56 dramatically alter host phenotypes. Furthermore, BV01 represents a new family of  
57 phages infecting human gut symbionts, providing a foundation for future investigations  
58 of phage-host interactions in these clinically-relevant but underexplored hosts.

59

## 60 **INTRODUCTION**

61 The human gut is colonized by a dense and diverse microbial community  
62 comprised of bacterial, archaeal, and fungal cells, as well as the viruses that infect them.  
63 This gut microbiome is vital to human health and development, and is linked to an  
64 increasingly long list of disease states. Recent work has specifically implicated the gut  
65 phageome in disease, including inflammatory bowel disease, malnutrition, AIDS,  
66 colorectal cancers, and hypertension (1–5). Broadly, gut phages act as important  
67 modulators of bacterial community structure (4, 6, 7) and metabolism (8). Despite their  
68 apparent importance, little is known about how most gut-associated phages interact with  
69 their bacterial hosts.

70           The *Bacteroides* is one of the most common and abundant bacterial genera in the  
71 distal human gut. The genus is known to degrade a diversity of complex carbohydrates  
72 (9, 10), and interact with host immune cells (11, 12). Within a single human host, many  
73 *Bacteroides* species and strains coexist, competing for nutrients under changing  
74 environmental conditions caused by host diet (13), host metabolites (14), host immune  
75 system activities (15, 16), and phage predation (17). Moreover, horizontal gene transfer  
76 plays an important role in shaping the evolution and function of *Bacteroides* genomes  
77 (18, 19). How the diversity of *Bacteroides* strains in the human gut persists over time in  
78 such a dense, dynamic, and competitive environment is likely multi-fold, and perhaps  
79 afforded by their highly plastic genomes.

80           Phage diversity and phage-host interactions within most commensal gut-  
81 associated bacteria, including *Bacteroides* species, is underexplored. Currently, the most  
82 abundant gut-associated phages are the crAssphages (20, 21), a group of related lytic  
83 phages that infect *Bacteroides intestinalis* and potentially other species. CrAssphages  
84 demonstrate how traditional phage techniques (*e.g.*, agar overlay plaque assays) are not  
85 reliable for *Bacteroides* hosts (22), likely due to heterogeneity in capsular polysaccharide  
86 composition within isogenic cultures (23, 24). In fact, deletion of all capsular  
87 polysaccharide synthesis loci allows for the isolation of many phages on the host  
88 *Bacteroides thetaiotaomicron* VPI-5482 (17). Most phages isolated against *Bacteroides*  
89 hosts thus far exhibit an obligately lytic lifestyle (17, 22, 25, 26), despite the potentially  
90 large role of lysogeny in phage-host interactions in the gut, where at least 17% of the gut  
91 phageome is predicted to be temperate (27, 28).

92 Prophage–host interactions have the potential to cause complex alterations to the  
93 host phenotype by virtue of the temperate lifestyle having two distinct phases: lysogeny  
94 and lysis. Unlike most strictly lytic phages, temperate phages may horizontally transfer  
95 beneficial genes between hosts, such as antibiotic resistance genes (29) and auxiliary  
96 metabolic genes (30, 31). Some phage regulatory machinery expressed from prophages  
97 can modulate the transcription of host genes, resulting in altered phenotypes (32, 33).  
98 Integration of prophages into the host genome may also disrupt or enhance the activity of  
99 surrounding chromosomal genes (34–36). While much is known about how these  
100 prophage–host interactions contribute to virulence in pathogens (37–41), exceedingly  
101 little is about how temperate phages modulate the activities of commensals.

102 Here we have identified an active prophage, *Bacteroides phage BV01*, in a  
103 genetically tractable host strain, *B. vulgatus* ATCC 8482, and characterized its effects on  
104 the host’s transcriptome and phenotype. Further we determine that BV01 represents a  
105 larger group of *Bacteroides*-associated prophages comprising the proposed phage family  
106 *Salyersviridae*, which are common members of the human gut phageome. This work  
107 provides the first insights to how the *Bacteroides* react to temperate phage infection, and  
108 establishes a model system for exploring complex phage–host interactions in an  
109 important human gut symbiont.

110

## 111 RESULTS

112 ***Bacteroides phage BV01* is a prophage in *B. vulgatus* ATCC 8482.** *Bacteroides*  
113 *phage BV01* was first partially predicted with ProPhinder and deposited in the ACLAME  
114 database (42, 43). Through comparative genomics and annotation of this region, we

115 extended the predicted BV01 prophage to 58.9 Kb (NC\_009614.1: 3,579,765..3,638,687),  
116 comprised of 72 predicted ORFs (Fig. 1), a prediction that agrees with an observation of  
117 prophage induction from *B. vulgatus* ATCC 8482 in a gnotobiotic mouse model (44).  
118 BV01 encodes genes suggesting a temperate lifestyle, with a putative CI-like repressor  
119 and a Cro-like anti-repressor, as well as a holing-lysin-spanin operon (Fig. 1).

120 BV01 is detectable outside of host cells in the supernatants of *in vitro* cultures as  
121 a DNase-protected, dsDNA genome by both sequencing (Fig. 1) and PCR (Fig. 2A). An  
122 isogenic cured lysogen ( $\Delta$ BV01) strain constructed by replacement with the  
123 corresponding chromosomal region of an uninfected *B. vulgatus* strain (*attB*) does not  
124 release free BV01 (Fig. 1, 2A). Assembly of sequencing reads from free BV01 phage  
125 DNA results in a circular contig that spans the phage attachment site (*attP*). The BV01  
126 *attP* is identical to the left and right attachment sites (*attL* and *attR*), a pair of 25-bp direct  
127 repeat sequences (5'-GTCTAGTTTAGTTTTTGTGTTGTAA-3'), suggesting BV01  
128 enters a circular intermediate before replication.

129 To confirm that the release of DNase-protected BV01 genomes from host cells is  
130 a phage-encoded and directed process, we sought to identify the phage integrase. BV01  
131 encodes three genes with integrase domains (PF00589); we hypothesized that the gene  
132 BVU\_RS14130, adjacent to the phage attachment site, was the most likely candidate for  
133 catalyzing integration and excision of BV01. A BVU\_RS14130 deletion mutant ( $\Delta$ *int*)  
134 was constructed (Fig. 1) and its activity assayed by PCR of paired cell pellets and DNase-  
135 treated culture supernatants (Fig. 2A). Phage DNA was not detected in the supernatants  
136 of the  $\Delta$ *int* strain. Furthermore, the  $\Delta$ *int* mutant does not yield an amplicon for the  
137 circularization of the BV01. Expression of the *int* gene *in trans* from a pNBU2 plasmid

138 complements both the circularization and release phenotypes (Fig. 2A). These results  
139 demonstrate that the integrase encoded by BVU\_RS14130 is necessary for phage  
140 excision, circularization, and release from the host. Furthermore, they suggest that BV01  
141 is an intact prophage capable of directing its own mobilization.

142 Despite numerous attempts, we have not identified *in vitro* inducing conditions  
143 for BV01. This has included treatments with UV light and sub-inhibitory concentrations  
144 of norfloxacin and mitomycin C (data not shown). BV01 supernatants never produced a  
145 plaque on any of 10 *B. vulgatus* isolates tested, the *B. vulgatus* cured lysogen, *B.*  
146 *thetaitotaomicron* VPI-5482, or *Bacteroides dorei* DSM 17855, on any of four media:  
147 TYG, BHI-HB, BHI-HM, and TYG<sub>S</sub>. To test for new lysogenic infections, BV01 was  
148 tagged with a copy of *tetQ*, conferring tetracycline resistance, using allelic exchange.  
149 Transduction of BV01 or BV01-*tetQ* via culture supernatants or in co-culture with  
150 erythromycin resistant hosts tagged with pNBU2-*bla-ermG<sub>b</sub>* has never generated  
151 transductants. We conclude that BV01 is a latent prophage in culture, which is further  
152 supported by transcriptional data showing that BV01 exists in a largely repressed state  
153 (Fig. S1).

154 The only infectious conditions that have been identified for BV01 are in a  
155 gnotobiotic mouse model (Fig. 2B). Within a single day of gavage, BV01-*tetQ*  
156 transductants were identified on doubly-selective media from mouse pellets from 4 of the  
157 7 mice. Over the course of the 11-day experiment transductants were eventually observed  
158 in all animals, in all cages. The average frequency of transduction ranged from  $1.9 \times 10^{-6}$   
159 to  $3.6 \times 10^{-9}$  per animal. These results support the hypothesis that an unknown  
160 mammalian host factor is required for novel BV01 infection.

161           **Lysogeny with BV01 alters the host transcriptome.** It was hypothesized that  
162 lysogeny with a prophage such as BV01 could alter the activities of the *B. vulgatus* host.  
163 RNA sequencing (RNAseq) of the *B. vulgatus* wild-type lysogen and the isogenic cured  
164 lysogeny was performed to identify transcripts differentially regulated in response to  
165 BV01 lysogeny (Fig. 3).

166           Analysis of RNAseq data revealed 115 host transcripts differentially regulated in  
167 response to lysogeny with BV01 (Fig. 3A), 103 of which (89%) are up-regulated in the  
168 cured lysogen (Table S1). These transcriptional changes occur across the host genome  
169 (Fig. 1B). Functional analysis of these transcripts revealed that most function in  
170 metabolism and cellular processes and signaling (Fig. 3C). Pathway analysis using the  
171 Kyoto Encyclopedia of Genes and Genomes Pathway Database (45), however, failed to  
172 yield pathway-level differences, which is likely a reflection of the level of annotation of  
173 the *B. vulgatus* genome. Taken together, these results indicate BV01 represses a diverse  
174 array of its host's metabolic activities, suggesting it is acting through one or more  
175 transcriptional regulators.

176           One possible explanation for the widespread transcriptomic response to BV01  
177 lysogeny is that a phage product directly alters the transcriptional activity of host genes.  
178 BV01 encodes two candidate genes that might act in this way: a predicted transcriptional  
179 regulator (BVU\_RS14475) and a predicted sigma factor-like protein (BVU\_RS14235)  
180 (Fig. S1). The transcriptional regulator encoded by BVU\_RS14475 is the most highly  
181 transcribed gene in the BV01 prophage, encoding the putative CI-like repressor protein,  
182 which might directly interact with host promoters. Transcription of BVU\_RS14235 is  
183 very low, so it is less likely to play a major role in the observed transcriptional response



184 (Fig. S1). It is also possible that the observed transcriptional response to BV01 is the  
185 result of a host response to infection. A universal stress protein (*uspA*) homolog  
186 (BVU\_RS16570) is upregulated in the BV01 lysogen, though it is not clear if that is a  
187 primary or secondary effect of infection.

188 **BV01 alters bile acid metabolism by disrupting the *tspO* promoter.** Notably,  
189 integration of BV01 at the *attB* is correlated with a 23-fold down-regulation of the  
190 adjacent downstream transcript (BVU\_RS14490), through an apparent disruption of the  
191 gene's promoter (Fig. 4A). A low level of expression at this gene is observed in the wild-  
192 type lysogen, perhaps a result of readthrough from phage transcripts. This gene encodes a  
193 predicted tryptophan rich sensory protein (TspO) homolog (Fig. 4B), an intramembrane  
194 protein whose endogenous ligand is unknown, but which is broadly implicated in  
195 metabolic regulation and stress response in other bacteria (46–48). Although TspO is  
196 conserved in many bacteria, archaea, and eukaryotes, it is considered an accessory  
197 protein. Indeed, not all gut-associated members of the family Bacteroidales nor the genus  
198 *Bacteroides* encode *tspO* (Fig. 4C). Within the *Bacteroides*, *tspO* is restricted to the clade  
199 including *B. vulgatus* and *B. dorei*. Among *B. vulgatus* strains TspO is highly conserved  
200 (Fig. 4D), suggesting it plays a specialized role in regulating the cellular activities unique  
201 to *B. vulgatus*.

202 Given TspO's important role in regulating cellular activities in other bacterial  
203 systems, it was hypothesized that it may be responsible for some of the differential  
204 regulation observed in response to prophage BV01. A *tspO* deletion mutant was  
205 constructed in the cured lysogen background ( $\Delta$ BV01 $\Delta$ *tspO*) and its transcriptome  
206 sequenced alongside that of the wild-type and cured lysogen strains (Fig. 3). The

207 predicted *tspO* regulon extends far beyond the differential expression observed in the  
208 cured lysogen (Fig. 3A, 3B), suggesting the small amount of *tspO* transcription in the  
209 BV01 lysogen exerts effects on the rest of the genome. Transcripts differentially  
210 regulated between the BV01 wild-type lysogen and cured lysogen which returned to wild  
211 type-like levels upon further deletion of *tspO* were classified as *tspO*-dependent  
212 transcripts (Fig. 3C). Of the 115 transcripts differentially regulated in response to BV01,  
213 69 (60%) are *tspO*-dependent. Consistent with TspO's role in regulating stress, many  
214 *tspO*-dependent transcripts fall into the COG category for post-translation modification,  
215 protein turnover, and chaperones, including several thioredoxins, peroxidases, and  
216 protein chaperones. *tspO*-dependent transcripts also account for the majority of metabolic  
217 genes differentially regulated in response to BV01.

218 Two *tspO*-dependent transcripts that are down-regulated in response to lysogeny  
219 with BV01 encode putative bile salt hydrolases (BVU\_RS13575, 5.38-fold change,  $q <$   
220  $10^{-100}$ ; BVU\_RS20010, 6.58-fold change,  $q < 10^{-200}$ ). It was hypothesized these  
221 transcriptional differences might reflect enzyme activities. To this end, *B. vulgatus* strains  
222 were grown in the presence of bile acids and the deconjugation of those bile acids  
223 measured by LC/MS (Fig. 5).

224 LC/MS results show that the wild-type *B. vulgatus* lysogen does not significantly  
225 deconjugate glycocholic acid (GCA) to cholic acid (CA), and may exhibit modest  
226 deconjugation of taurocholic acid (TCA) (Fig. 5). This agrees with a previous study that  
227 showed *B. vulgatus* ATCC 8482 can deconjugate TCA but cannot deconjugate GCA over  
228 a 48 hr incubation (49). Importantly, CA is clearly detectable only in the cured lysogen  
229 background, consistent with our prediction based on RNAseq data. This bile acid

230 deconjugation phenotype is ablated with the deletion of *tspO*, further supporting the  
231 hypothesis that *tspO* activates transcription of bile salt hydrolases, resulting in their  
232 increased enzymatic activity.

233 To see if *tspO*-disrupted lysogens occur in natural human gut microbiomes, read  
234 mapping from 256 healthy human gut metagenomes was performed. Starting with reads  
235 which mapped to *tspO* in the reverse orientation, read mates were checked for mapping to  
236 Phage BV01 and its relatives (Fig. 6). All samples had reads mapping to *tspO*, with an  
237 average of 0.0004% of metagenome reads mapping, indicating the corresponding  
238 population of *B. vulgatus* and *B. dorei* encoding *tspO* is relatively abundant (Fig. S2A).  
239 Incidence of *tspO* associated with BV01 or a related phage is also common; 13.3% of  
240 samples ( $n=34$ ) contained read pairs mapping to *tspO* and an adjacent prophage. Within  
241 an individual microbiome, incidence of *tspO*-disrupted lysogens appears rare, usually  
242 comprising 3% or less of the combined *B. vulgatus* and *B. dorei* population, although for  
243 some individuals this incidence rate can be more than 10% (Fig. S2B). In addition to  
244 these patterns, carriage of *tspO*-disrupted lysogens appears stable over time, as indicated  
245 by individuals sampled at multiple time points (Table S2). Together, these data suggest  
246 that BV01 and other phages' effects on downstream phenotypes via *tspO* are likely quite  
247 common among humans, though these lysogens comprise the minority of the overall  
248 microbiome.

249 **BV01 represents the proposed viral family *Salyersviridae*.** While searching for  
250 potential new hosts for BV01, its predicted 25-bp *attB* was queried against 154 gut-  
251 associated Bacteroidales genomes. It was found that all *Paraprevotella* and *Bacteroides*  
252 genomes had at least the first 21 bases of the attachment site conserved (Fig. 6A). In 20

253 genomes, two copies of the *att* site were found, and all are associated with putative  
254 prophages. In all instances, the putative *attL* and *attR* sites are direct repeats, as is true for  
255 BV01. Importantly, only *B. vulgatus* lysogens encode *tspO* (Fig. 4); other prophages and  
256 *attB* sites occur in an alternative genomic context. Alignment of these putative prophage-  
257 associated *att* sites finds that the first 22 basepairs are always conserved, and an  
258 additional 3 basepairs are variable among lysogen genomes (Fig. 6B).

259         Integration at the same *att* site suggests these prophages are genetically related.  
260 To assess relatedness, VICTOR (50) was used to build a genome tree from all of the  
261 identified prophages (Fig. 6C) and OPTSIL clustering (51) was used to predict taxonomic  
262 groups, which we named *Salyersviridae*, *Salyersvirinae*, and *Salyersvirus* (Table 1).  
263 Taxonomic clustering also defined phage species, four of which have more than one  
264 member. Interestingly, the phage species BX01 has representatives in two distantly  
265 related hosts, *Bacteroides xyloxylophilus* XB1A (phage BX01) and *B. thetaiotaomicron*  
266 1\_1\_6 (phage BT01), suggesting that at least some Salyersviruses have broad host ranges.  
267 Phage BC01 was placed outside the subfamily *Salyersvirinae*, which is consistent with its  
268 considerable sequence divergence (Fig. S3). Further examination of the BC01 *attL* and  
269 *attR* sites found that the 22-bp consensus sequence is only a portion of the full 69-bp  
270 repeat flanking the BC01 prophage, which further supports placement of BC01 outside  
271 the *Salyersvirinae*. Also included in the analysis were three outgroup sequences from the  
272 known *Bacteroides*-infecting lytic phages: B124-14, B40-8, and crAssphage.  
273 Surprisingly, OPTSIL taxonomic clustering placed phages B124-14 and B40-8 in the  
274 family *Salyersviridae*. This similarity is not detectable at the level of nucleotide sequence

275 (Fig. S3), but is likely driven by similarities in several proteins, including homologs to  
276 the predicted lysin, excisionase, and ssDNA binding protein from BV01.

277 To check that the proposed *Salyersviridae* clade was comprised of active phages,  
278 we searched for evidence of activity in culture and in wastewater samples. Sequencing  
279 and PCR were used to test the activity of six additional Salyersviruses (Fig. S4). Phages  
280 BV02, BV05, and BV06 were found to be released from host cells in culture, while BV03  
281 is likely inactivated by genomic rearrangement. We did not observe activity for BV04 or  
282 BO03 from *B. ovatus* ATCC 8483, both of which appear complete based on synteny with  
283 intact Salyersviruses. This may be the result of inactivating mutations or not being  
284 induced in the growth conditions tested (Fig. S4D).

285 Furthermore, we used read mapping to search for evidence of all 20  
286 *Salyersviridae* phages in a wastewater metavirome (Fig. S5A). Reads mapped to all  
287 *Salyersviridae* genomes, however it may be the result of sequence conservation within  
288 the family, as reads often accumulate at the most conserved regions of each phage  
289 genome. Further, very little read mapping occurred in the distal portion of the inactivated  
290 prophage BV04, which resembles host chromosome more than phage sequence,  
291 indicating that virome processing removed most cellular DNA prior to sequencing (Fig.  
292 S5A). *De novo* assembly of the individual wastewater viromes finds contigs which align  
293 with high identity but imperfectly to each *Salyersviridae* phage, supporting the findings  
294 seen by read mapping, and suggesting the real diversity of the family *Salyersviridae* is far  
295 greater than what has been observed integrated in cultured host genomes so far. This  
296 analysis found that phages infecting *B. vulgatus* are more abundant than other  
297 *Salyersviridae* phages based on maximum normalized read coverages. A similar

298 comparison concludes that most individual temperate *Salyersviridae* phages are  
299 approximately equal in abundance to the lytic *Salyersviridae* phage B124-14 and B40-8,  
300 and approximately ten-fold less abundant than crAssphage, in these wastewater viromes  
301 (Fig. S5A). Searches for *Salyersviridae* phages in individual healthy human fecal  
302 metagenomes refine this conclusion, showing that in most human samples, *Salyersviridae*  
303 phages are at least as abundant as crAssphage, though crAssphage can reach very high  
304 abundances in a subset of individuals (Fig. S5B). Although confirmation of most  
305 *Salyersviridae* activities will require better sampling and *in vitro* testing, these results  
306 indicate the phage family is active in human-associated communities.

307

## 308 **DISCUSSION**

309 Here, we characterize a complex phage-host interaction between *Bacteroides*  
310 *phage BV01* and its host *B. vulgatus*. We first demonstrate that BV01 is an intact  
311 prophage capable of directing its own excision, and it is transducible *in vivo* in a  
312 gnotobiotic mouse model. Using a combination of genetics, RNAseq, and analytical  
313 chemistry, we show that BV01 decreases its host's ability to deconjugate bile acids by  
314 disrupting the transcription of the gene adjacent to the *attB* encoding a TspO homolog.  
315 Furthermore, we show that *tspO* disruption by phage integration is common among, but  
316 rare within, healthy human gut microbiomes, and can be mediated by BV01 or its  
317 relatives. Together, these findings elucidate a complex mechanism by which a phage  
318 alters its host's activities.

319 The repression of bile acid deconjugation as a consequence of BV01 integration is  
320 particularly relevant in the context of the mammalian gut. Mammals secrete conjugated

321 primary bile acids into the small intestine, where they reach concentrations as high as 1  
322 mM (52); though the majority of bile acids secreted into the small intestine are  
323 reabsorbed, they can still accumulate to concentrations of 0.2-1 mM in the colon (53).  
324 While bile acids are broadly capable of damaging lipid membranes, generally  
325 *Bacteroides* species are considered bile-resistant (54), the mechanism of which is  
326 unknown. Bile acid deconjugation is a common activity encoded by gut-associated  
327 microbes, though its direct benefit to those microbes is unclear. Microbial modification of  
328 the bile acid pool can be linked to beneficial changes in the human host metabolism (49,  
329 55) and varied epithelial susceptibility to viral pathogens (56). The link between BV01  
330 and bile acid metabolism suggests a heretofore undescribed mechanism by which gut  
331 phages might influence mammalian host phenotypes.

332         Here, bile acid deconjugation in *B. vulgatus* is dependent on a putative TspO.  
333 Bacterial TspOs are important for regulating metabolic switches and stress regulation in  
334 at least three diverse systems (46–48), though the mechanism of action for the protein is  
335 unknown. The crystal structure of TspO shows a periplasm-facing binding pocket distinct  
336 from the intramembrane cholesterol recognition consensus sequence, which may bind or  
337 degrade porphyrins (57–59). Both the porphyrin degrading and cholesterol transporting  
338 functions of TspO, however, have been disputed (60, 61). Despite this, it is notable that  
339 cholesterol is structurally similar to bile acids, being their biosynthetic precursor. In at  
340 least one other gut-associated microbe, *tspO* is up-regulated by bile acids, suggesting  
341 TspO may be involved in bile acid metabolism in gut microbes more broadly (62). The  
342 regulatory link described here between bile acid hydrolysis and TspO suggests a

343 hypothesis where the *B. vulgatus* TspO might be a sensor and regulator of bile acid  
344 interactions.

345 Induction of BV01 from its integrated state and infection of new hosts remains  
346 enigmatic. Prophage induction is canonically linked to stress-dependent pathways, as is  
347 the case for lambdoid phages that respond to DNA damage via RecA-dependent cleavage  
348 of the CI repressor protein (63). It is possible that prophages in *Bacteroides* hosts respond  
349 to alternative stimuli, as is the case for CTnDOT, a well-studied *Bacteroides* conjugative  
350 transposon, whose excision is inducible only by tetracycline (64). Neither DNA damage  
351 nor antibiotics induce prophage BV01 *in vitro*, so all experiments here relied on an  
352 apparently low rate of spontaneous prophage induction. Similarly, no infecting conditions  
353 or susceptible hosts have been identified for BV01 *in vitro*. We demonstrate that BV01 is  
354 transducible in a gnotobiotic mouse model, suggesting that an unknown mammalian host  
355 factor is required for novel BV01 infection. Enigmatic infection dynamics may be the  
356 result of the phase variable polysaccharide capsule, as recent work suggests heterogeneity  
357 in capsular composition hinders phage infection on population-scales (17). Indeed, it has  
358 long been observed that finding phages in the *Bacteroides* using traditional techniques is  
359 difficult or impossible for most host strains (65, 66), making the host-first approach to  
360 phage discovery used here especially appealing.

361 Finally, phage BV01 is the first representative of a broad family of phages that  
362 spans an entire host genus, and includes lytic and temperate members. *Salyersviridae* is  
363 common and diverse among natural human samples, but rare within individuals,  
364 suggesting lysogenization may confer frequency-dependent advantages to the bacterial  
365 host. The genetic context of non-*B. vulgatus* *Salyersviridae* lysogens remains unexplored,



366 providing ample opportunity for further discovery of novel phage-host interactions. The  
367 absence of *tspO* in these other host systems may provide the ideal background for  
368 studying more direct impacts of these phages on their hosts. Certainly, other interactions  
369 between BV01 and its host remain to be studied, though they were overshadowed here by  
370 the enormous effects of *tspO*. Future studies should also examine the role of  
371 *Salyersviridae* phages on bacterial host fitness and evolution (67, 68), as these phages  
372 directly impact their bacterial hosts and those interactions likely have important ripple  
373 effects throughout the microbiome and on the mammalian host that remain to be  
374 elucidated.

375

## 376 MATERIALS AND METHODS

377 **Strains and culture conditions.** All strains and plasmids used in the study are  
378 listed in Table S3. *Escherichia coli* S17-1  $\lambda$  *pir* was used for all routine recombinant  
379 DNA cloning, and grown aerobically in Lysogeny Broth (LB) at 37°C. *B. vulgatus* strains  
380 were cultured anaerobically in a vinyl anaerobic chamber using 70% N<sub>2</sub>, 20% CO<sub>2</sub>, and  
381 10% H<sub>2</sub> gas mixture (Coy Laboratory Products, Grass Lake, MI). All *B. vulgatus* cultures  
382 were grown on Difco Brain Heart Infusion (BHI) agar supplemented with 10%  
383 defibrinated horse blood (BHI-HB; Quad Five, Ryegate, MT), or in tryptone-yeast  
384 extract-glucose (TYG) broth (69) at 37°C. When necessary, ampicillin (100 µg/mL),  
385 gentamicin (200 µg/mL), erythromycin (25 µg/mL), 5'-flourodeoxyuridine (FUdR; 20  
386 µg/mL), or tetracycline (2 µg/mL) were supplemented in the media. Infection assays were  
387 performed on BHI supplemented with 50 µg/mL hemin and 0.5 µg/mL menadione (BHI-  
388 HM) and TYG<sub>S</sub> (70).

389           **Genetic manipulation.** All primers used to construct genetic mutants are listed in  
390 Table S3. Markerless deletion mutants in *B. vulgatus* were achieved by allelic exchange  
391 using a system analogous to that developed in *B. thetaiotaomicron*, (71) and confirmed  
392 by PCR and whole genome sequencing. The *tdk* gene (BVU\_RS09305), encoding  
393 thymidine kinase, was deleted from *B. vulgatus* ATCC 8482 by allelic exchange,  
394 conferring resistance to the toxic nucleotide analog FUdR. Cloning was performed as  
395 described by Degnan *et al.* (72). Briefly, the 3.5 Kb regions flanking either side of *tdk*  
396 were amplified with Kapa HiFi Taq MasterMix (Kapa Biosystems, Wilmington, MA)  
397 and joined by splicing overlap exchange (SOE) PCR. The SOE product was purified,  
398 restriction digested and ligated into the suicide vector pKNOCK-*bla-ermGb* in *E. coli*,  
399 and conjugated into *B. vulgatus*. Single recombinant merodiploids were selected for on  
400 BHI-HB supplemented with gentamicin and erythromycin, and double recombinant  
401 deletion mutants subsequently selected for on BHI-HB with FUdR. The counterselectable  
402 suicide vector pExchange-*tdkBV* was constructed by amplifying *tdk* from *B. vulgatus* and  
403 cloning the *tdk* amplicon into pKNOCK-*bla-ermGb*, by the same methods used to clone  
404 the SOE product above.

405           Subsequent deletions were accomplished similarly as described for *tdk*, except  
406 using pExchange-*tdkBV* and flanking regions of ~1 Kb to create the deletion alleles  
407 (*tspO*, *int*). For deletion of the entire BV01 provirus, an empty attachment site (*attB*) and  
408 the flanking 800 bp were cloned from *B. vulgatus* VPI-4506, which has 99.9% nucleotide  
409 identity to the analogous regions flanking BV01 in *B. vulgatus* ATCC 8482.

410           Complementation of the BV01 integrase (BVU\_RS14130) was accomplished by  
411 cloning the gene and its native promoter into the integrative plasmid pNBU2-*bla-ermGb*,

412 which has a single integration site in the *B. vulgatus* genome (*attN*;  
413 NC\_009614.1:3152550..3152572). This construct was conjugated into *B. vulgatus* and  
414 transconjugants selected for on BHI-HB supplemented with gentamicin and erythromycin  
415 as described elsewhere (72).

416 The BV01-*tetQ* strain was constructed by inserting *tetQ* from pNBU2-*bla-tetQ*  
417 immediately downstream of the stop codon of BVU\_RS14265, upstream of a predicted  
418 transcriptional terminator. As was done for deletion constructs, the desired region was  
419 constructed on the pExchange-*tdkBV* plasmid and moved into the wild-type *B. vulgatus*  
420 strain by allelic exchange. First, a ~2 Kb region surrounding the BVU\_RS14265 stop  
421 codon was amplified in two pieces with SOE primers designed to insert adjacent SpeI and  
422 BamHI cut sites downstream of the stop codon and ligated into pExchange-*tdkBV*. This  
423 construct was confirmed by Sanger sequencing before *tetQ* and its promoter were  
424 amplified from CTnDOT, and ligated into the SpeI and BamHI cut sites. Tetracycline  
425 was used to select for mutants, and release of BV01-*tetQ* phages confirmed by PCR.

426 Select mutant strains were confirmed by whole genome sequencing and analyzed  
427 with Breseq (73) aligned to the wild-type *B. vulgatus* ATCC 8482 genome  
428 (NC\_009614.1), and summarized in Table S4.

429 **Genome sequencing.** Cells were pelleted from 5 mL overnight culture in TYG by  
430 centrifugation at  $4,000 \times g$  for 5 min at 4°C, resuspended in 0.5 mL TE buffer (10 mM  
431 Tris, 1 mM EDTA), and lysed by adding sodium dodecyl sulfate (SDS) and proteinase K  
432 (GoldBio, Olivette, MO) to final concentrations of 0.07% and 300 µg/mL, respectively,  
433 and incubating for 2 hr at 55°C. Cellular material was removed by washing twice in an  
434 equal volume of buffered phenol, phenol-chloroform-isoamyl alcohol (VWR, Radnor,

435 PA), and DNA precipitated with 100% ethanol in the presence of 0.3M sodium acetate at  
436 -20°C overnight. DNA pellets were washed with 70% ethanol, dried, and resuspended in  
437 TE buffer.

438 Phage DNA was prepared from overnight TYG culture supernatants collected  
439 after centrifugation and concentrated by centrifugation with 30,000 MWCO Corning  
440 Spin-X UF 20 Concentrators (Corning, NY) or by tangential flow filtration with a  
441 Vivaflow 50R 30,000 MWCO Hydrosart filter (Sartorius, Gottingen, Germany).  
442 Supernatants were treated with 200 µg/mL DNase I and 1 µg/mL RNase A for 1 hr at  
443 room temperature to remove unprotected DNA and RNA. Virions were disrupted with  
444 1% SDS and 1 mg/mL proteinase K for 2 hr at 55°C. DNA was further isolated using the  
445 same phenol-chloroform-isoamyl alcohol extraction and ethanol precipitation procedures  
446 as for cellular DNA.

447 DNA libraries were constructed with the Nextera XT Library Preparation Kit and  
448 Index Kit (Illumina, San Diego, CA). DNA libraries were pooled and sequenced on both  
449 the Illumina HiSeq5000 and HiSeq2500 and fastq files were generated from  
450 demultiplexed reads with bcl2fastq Conversion Software (Illumina, San Diego, CA).  
451 Reads were trimmed and assembled using the A5ud pipeline (74). Sequencing methods  
452 and assembly data are summarized in Table S5.

453 **Genome annotation.** Annotation of cellular genomes was accomplished with a  
454 custom Perl script that calls protein coding genes with Prodigal (75) and RNA coding  
455 genes with tRNAscan-SE (77), Rnammer (78) and Infernal (78). Functional predictions  
456 are assigned by searching against Kyoto Encyclopedia of Genes and Genomes (45),

457 Cluster of Orthologous Genes (80), Pfam (80), and TIGRFAM (81) databases, and  
458 subCELLular LOcalization predictor (82) is used to predict cellular localization.

459 For phage genomes, genes were called by Prodigal and the gene calling tool  
460 within Artemis (83). Functional predictions were made as above except with relaxed  
461 search parameters (cut\_tc in hmmscan), plus using Basic Local Search Alignment Tool  
462 (84) with the Genbank virus database (85), Phyre2 (86) to identify conserved protein  
463 folds, and iVireons (87) to predict structural proteins, and manually comparing and  
464 combining results.

465 **Integrase activity assays.** Integrase activity was assayed through PCR of DNase-  
466 treated supernatant DNA. Briefly, free phage DNA was prepared as for DNA sequencing,  
467 and amplified with Kapa HiFi Taq MasterMix with primers specific to BV01  
468 (BVU\_RS14350) or spanning the circularized *attP* (Table S3). Free phage DNAs were  
469 checked for the presence of contaminating cellular DNA by amplifying the 16S rRNA  
470 gene with universal primers. Amplicons were cleaned with a Qiagen PCR Cleanup kit  
471 (Hilden, Germany) and run on an agarose gel in 0.5X Tris-borate-EDTA buffer at 70V  
472 alongside 1 Kb ladder (New England BioLabs, Ipswich, MA) or GeneRule Express DNA  
473 Ladder (Thermo Scientific, Waltham, MA) and stained with GelRed (VWR, Radnor,  
474 PA). Amplicons generated with *attP*-flanking primers were sequence confirmed by  
475 Sanger sequencing performed by ACGT, Inc (Wheeling, IL).

476 **Gnotobiotic mice.** All experiments using mice were performed using protocols  
477 approved by the University of California Riverside Institutional Animal Care and Use  
478 Committee. Germfree C57BL/6J mice were maintained in flexible plastic gnotobiotic  
479 isolators with a 12-hr light/dark cycle. Animals caged individually ( $n=1$ , female) or in

480 pairs of litter mates ( $n=6$ , males) were provided with standard, autoclaved mouse chow  
481 (5K67 LabDiet, Purina) *ad libitum*. With no *a priori* reason to expect age to influence  
482 transduction rates, animals ranged from 7 weeks to nearly 12 months old. Individually  
483 antibiotic resistance marked bacterial strains were grown individually for ~20h in TYG  
484 medium with appropriate antibiotics and frozen at  $-80^{\circ}\text{C}$  in anaerobic cryovials. Cell  
485 viability was tested by plating and viable CFU counts were used to combine equal parts  
486 of the wild-type *B. vulgatus* lysogen tagged with pNBU2-*bla-ermGb* and *B. vulgatus*  
487 BV01-*tetQ* tagged with pNBU2-*bla-cfx*. Approximately  $4 \times 10^6$  CFUs of the combined  
488 strains were administered to each animal by oral gavage. Fecal samples were collected on  
489 days 1, 3, 7 and 11 from each animal. Fecal pellets were processed by adding 500 $\mu\text{l}$  of  
490 TYG+20% Glycerol to each tube and vigorously shaking in a beadbeater without beads  
491 for 1m 30s. Fecal slurries were spun down at 2,000  $\times g$  for 1 s, followed by serial dilution  
492 on selective media (BHI+Tet+Gn, BHI+Erm+Gn, BHI+Erm+Tet+Gn) to determine  
493 CFUs. Animals were sacrificed on d11 following final fecal collection.

494 **Transcriptomic response to lysogeny.** *B. vulgatus* was grown overnight in 5 mL  
495 TYG medium. Each culture was pelleted ( $4,000 \times g$  for 5 min at  $4^{\circ}\text{C}$ ), supernatant  
496 decanted, and washed in an equal volume of TYG three times. Cells were normalized to  
497 an  $\text{OD}_{600}$  of ~0.3 and used to inoculate cultures in 10 mL TYG at a final dilution of  
498 1:1000 in biological triplicate. Cell growth was monitored and cells were harvested at an  
499  $\text{OD}_{600}$  of ~0.4. Total RNA was prepared with a Qiagen RNeasy kit (Hilden, Germany)  
500 and treated on-column with RNase-free DNase (Qiagen, Hilden, Germany). RNA was  
501 quantitated with a Qubit 2.0 fluorometer (Thermo Fisher, Waltham, MA) and stored at -  
502  $80^{\circ}\text{C}$ .

503 RNA was submitted to the W. M. Keck Center for Comparative and Functional  
504 Genomics at the University of Illinois at Urbana-Champaign for quality analysis, rRNA  
505 depletion with the RiboZero Bacteria kit (Illumina, San Diego, CA), library construction  
506 with the TruSeq Stranded mRNAseq Sample Prep kit (Illumina, San Diego, CA), and  
507 sequencing on an Illumina NovaSeq 6000 with the NovaSeq S4 reagent kit. Fastq files of  
508 demultiplexed reads were prepared with the bcl2fastq v2.20 Conversion Software  
509 (Illumina, San Diego, CA).

510 RNAseq reads were quality filtered and trimmed with trim\_galore v0.4.4  
511 ([https://www.bioinformatics.babraham.ac.uk/projects/trim\\_galore/](https://www.bioinformatics.babraham.ac.uk/projects/trim_galore/)). Rockhopper (88)  
512 was used to identify differentially expressed transcripts between isogenic mutants ( $\geq 2$ -  
513 fold change,  $q \leq 0.01$ ).

514 **Bile salt deconjugation assay & LC/MS.** *B. vulgatus* strains were inoculated in  
515 TYG liquid supplemented with 50  $\mu$ M glycocholic acid (GCA) or 50  $\mu$ M taurocholic  
516 acid (TCA) and allowed to grow for 16 or 28 hr, respectively. Grown cultures were  
517 brought to a pH 2.0-3.0 with 10 N hydrochloric acid, centrifuged for 5 min at 4,000 x g,  
518 and the pellets discarded. Bile acids were isolated by solid phase extraction over Sep-Pak  
519 tC18 500 mg cartridges (Waters Corp., Milford, MA). Cartridges were preconditioned by  
520 serial washes with 6 mL hexane, 3 mL acetone, 6 mL methanol, and 6 mL water (pH =  
521 3.0). Acidified supernatants were loaded before washing with 3 mL 40% methanol. The  
522 column was allowed to dry, then bile acids eluted in 3 mL methanol. Samples were  
523 evaporated under nitrogen, resuspended in 20  $\mu$ L methanol, and centrifuged before  
524 analysis by liquid chromatography-mass spectroscopy (LC/MS).

525 LC/MS for all samples was performed on a Waters Aquity UPLC coupled with a  
526 Waters Synapt G2-Si ESI MS. Chromatography was performed using a Waters Cortecs  
527 UPLC C18 column (1.6  $\mu\text{m}$  particle size) (2.5 mm x 50 mm) with a column temperature  
528 of 40° C. Samples were injected at 1  $\mu\text{l}$ . Solvent A consisted of 95% water, 5%  
529 acetonitrile, and 0.1% formic acid. Solvent B consisted of 95% acetonitrile, 5% water,  
530 and 0.1% formic acid. The initial mobile phase was 90% Solvent A, 10% Solvent B and  
531 increased linearly until the gradient reached 50% Solvent A and 50% Solvent B at 7.5  
532 min. Solvent B was increased linearly again until it was briefly 100% at 8.0 min until  
533 returning to the initial mobile phase (90% Solvent A, 10% Solvent B) over the next 2  
534 min. The total run was 10 min with a flow rate of 10  $\mu\text{L}/\text{min}$ . MS was performed in  
535 negative ion mode. Nebulizer gas pressure was maintained at 400° C and gas flow was  
536 800 L/hour. The capillary voltage was set at 2,000 V in negative mode. MassLynx was  
537 used to analyze chromatographs and mass spectrometry data.

538 **Taxonomic nomenclature.** The family, subfamily, and generic names were  
539 chosen to honor the microbiologist Abigail A. Salyers, who made significant  
540 contributions to the understanding of function and genetics of human gut anaerobes and  
541 the importance of their mobile genetic elements.

542 **Wastewater collection, processing, and viromics.** From the Urbana &  
543 Champaign Sanitary District Northeast Plant (Urbana, IL), 1 L of unprocessed  
544 wastewater was collected at each of three time points: May 25, 2016, June 23, 2016, and  
545 October 3, 2016.

546 Wastewater samples were transported on ice, immediately centrifuged at 2,500  $\times$   
547 g for 10 min at 4°C and filtered through a 0.4  $\mu\text{m}$  polyethersulfone filter to remove large



548 particulate and cellular matter. The sample was split into three aliquots and processed  
549 three ways. One aliquot was not processed further (F). Another aliquot was filtered a  
550 second time through a 0.22  $\mu\text{m}$  polyethersulfone filter (DF). The last aliquot was washed  
551 three times with an equal volume of chloroform (FC). All aliquots were concentrated  
552 100-fold and virome DNA was isolated from each as described for genome sequencing of  
553 phages.

554 DNA libraries of virome DNA were prepared using the same methods as  
555 described for genome sequencing and were sequenced on an Illumina HiSeq 2500  
556 sequencer with a HiSeq v4 SBS sequencing kit (Illumina, San Diego, CA) producing  
557 2 $\times$ 160-bp paired-end reads. Fastq files of demultiplexed reads were generated with the  
558 bcl2fastq v2.17.1.14 Conversion Software (Illumina, San Diego, CA). Reads were  
559 trimmed and quality filtered using Trimmomatic 0.38 (89) and assembled with  
560 metaSPAdes v3.13.0 using default parameters (90). Sequencing and assembly data for  
561 wastewater viromes is summarized in Table S5. Read mapping to phage genomes was  
562 performed with bwa (91).

563 Human Microbiome Project Healthy Human Subjects Study samples were  
564 downloaded with portal\_client (Table S2). Read mapping was performed with bwa (91).

565 **Data availability.** Trimmed RNAseq reads from this study are deposited in the  
566 NCBI SRA under PRJNA622597; sample accession numbers are SAMN14522273 for  
567 the wild-type lysogen (WT), SAMN14522274 for the cured lysogen ( $\Delta\text{BV01}$ ), and  
568 SAMN14522275 for the cured lysogen *tspO* deletion ( $\Delta\text{BV01}\Delta\text{tspO}$ ). Trimmed  
569 wastewater virome reads are deposited in the NCBI SRA under PRJNA622299. Ten new  
570 assembled *B. vulgatus* genomes are deposited in NCBI GenBank under PRJNA622758.

571

## 572 **ACKNOWLEDGMENTS**

573 We thank Nadja Shoemaker and Abigail Salyers for access to an impressive  
574 collection of *Bacteroides* isolates; Ken Ringwald for critical review of the manuscript;  
575 Jim Imlay for insightful discussion on metabolism and stress; Alvaro Hernandez and  
576 Chris Wright for DNA and RNA sequencing; Bruce Rabe for aid in wastewater  
577 collection; Jonathan Mitchell for maintenance and animal care at the UCR vivarium.

578 This research was supported by initial complement funding to PHD from UIUC  
579 and UCR and DC was supported by the Department of Microbiology from UIUC. LL  
580 was supported by the National Science Foundation Graduate Research Fellowship.  
581 Gnotobiotic mouse work and AH were supported by National Institute of General  
582 Medical Sciences grant R35GM124724. RJW is supported by the Allen Foundation with  
583 an Allen Distinguished Investigator Award.

584

## 585 **REFERENCES**

- 586 1. Norman JM, Handley SA, Baldrige MT, Droit L, Liu CY, Keller BC, Kambal A,  
587 Monaco CL, Zhao G, Fleshner P, Stappenbeck TS, McGovern DPB, Keshavarzian A,  
588 Mutlu EA, Sauk J, Gevers D, Xavier RJ, Wang D, Parkes M, Virgin HW. 2015.  
589 Disease-Specific Alterations in the Enteric Virome in Inflammatory Bowel Disease.  
590 Cell 160:447–460.
- 591 2. Reyes A, Blanton LV, Cao S, Zhao G, Manary M, Trehan I, Smith MI, Wang D,  
592 Virgin HW, Rohwer F, Gordon JI. 2015. Gut DNA viromes of Malawian twins  
593 discordant for severe acute malnutrition. Proc Nat Acad Sci USA 112:11941–11946.

- 594 3. Monaco CL, Gootenberg DB, Zhao G, Handley SA, Ghebremichael MS, Lim ES,  
595 Lankowski A, Baldrige MT, Wilen CB, Flagg M, Norman JM, Keller BC, Luévano  
596 JM, Wang D, Boum Y, Martin JN, Hunt PW, Bangsberg DR, Siedner MJ, Kwon DS,  
597 Virgin HW. 2016. Altered Virome and Bacterial Microbiome in Human  
598 Immunodeficiency Virus-Associated Acquired Immunodeficiency Syndrome. *Cell*  
599 *Host & Microbe* 19:311–322.
- 600 4. Hannigan GD, Duhaime MB, Ruffin MT, Koumpouras CC, Schloss PD. 2018.  
601 Diagnostic Potential and Interactive Dynamics of the Colorectal Cancer Virome.  
602 *mBio* 9:e02248-18.
- 603 5. Han M, Yang P, Zhong C, Ning K. 2018. The Human Gut Virome in Hypertension.  
604 *Front Microbiol* 9.
- 605 6. Moreno-Gallego JL, Chou S-P, Di Rienzi SC, Goodrich JK, Spector TD, Bell JT,  
606 Youngblut ND, Hewson I, Reyes A, Ley RE. 2019. Virome Diversity Correlates with  
607 Intestinal Microbiome Diversity in Adult Monozygotic Twins. *Cell Host & Microbe*  
608 25:261-272.e5.
- 609 7. Khan Mirzaei M, Khan MdAA, Ghosh P, Taranu ZE, Taguer M, Ru J, Chowdhury R,  
610 Kabir MdM, Deng L, Mondal D, Maurice CF. 2020. Bacteriophages Isolated from  
611 Stunted Children Can Regulate Gut Bacterial Communities in an Age-Specific  
612 Manner. *Cell Host Microbe* 27:199-212.e5.

- 613 8. Hsu BB, Gibson TE, Yeliseyev V, Liu Q, Lyon L, Bry L, Silver PA, Gerber GK.  
614 2019. Dynamic Modulation of the Gut Microbiota and Metabolome by  
615 Bacteriophages in a Mouse Model. *Cell Host & Microbe* 25:803-814.e5.
- 616 9. Salyers AA, Vercellotti JR, West SE, Wilkins TD. 1977. Fermentation of mucin and  
617 plant polysaccharides by strains of *Bacteroides* from the human colon. *Appl Environ*  
618 *Microbiol* 33:319–322.
- 619 10. Kaoutari AE, Armougom F, Gordon JI, Raoult D, Henrissat B. 2013. The abundance  
620 and variety of carbohydrate-active enzymes in the human gut microbiota. *Nature Rev*  
621 *Microbiol* 11:497–504.
- 622 11. Hickey CA, Kuhn KA, Donermeyer DL, Porter NT, Jin C, Cameron EA, Jung H,  
623 Kaiko GE, Wegorzewska M, Malvin NP, Glowacki RWP, Hansson GC, Allen PM,  
624 Martens EC, Stappenbeck TS. 2015. Colitogenic *Bacteroides thetaiotaomicron*  
625 Antigens Access Host Immune Cells in a Sulfatase-Dependent Manner via Outer  
626 Membrane Vesicles. *Cell Host & Microbe* 17:672–680.
- 627 12. Shen Y, Torchia MLG, Lawson GW, Karp CL, Ashwell JD, Mazmanian SK. 2012.  
628 Outer Membrane Vesicles of a Human Commensal Mediate Immune Regulation and  
629 Disease Protection. *Cell Host & Microbe* 12:509–520.
- 630 13. Tuncil YE, Xiao Y, Porter NT, Reuhs BL, Martens EC, Hamaker BR. 2017.  
631 Reciprocal Prioritization to Dietary Glycans by Gut Bacteria in a Competitive  
632 Environment Promotes Stable Coexistence. *mBio* 8:e01068-17.

- 633 14. Ridlon JM, Harris SC, Bhowmik S, Kang D-J, Hylemon PB. 2016. Consequences of  
634 bile salt biotransformations by intestinal bacteria. *Gut Microbes* 7:22–39.
- 635 15. Cullen TW, Schofield WB, Barry NA, Putnam EE, Rundell EA, Trent MS, Degnan  
636 PH, Booth CJ, Yu H, Goodman AL. 2015. Antimicrobial peptide resistance mediates  
637 resilience of prominent gut commensals during inflammation. *Science* 347:170–175.
- 638 16. Planer JD, Peng Y, Kau AL, Blanton LV, Ndao IM, Tarr PI, Warner BB, Gordon JI.  
639 2016. Development of the gut microbiota and mucosal IgA responses in twins and  
640 gnotobiotic mice. *Nature* 534:263–266.
- 641 17. Porter NT, Hryckowian AJ, Merrill BD, Gardner JO, Singh S, Sonnenburg JL,  
642 Martens EC. 2019. Multiple phase-variable mechanisms, including capsular  
643 polysaccharides, modify bacteriophage susceptibility in *Bacteroides*  
644 *thetaiotaomicron*. *bioRxiv* 521070.
- 645 18. Coyne MJ, Zitomersky NL, McGuire AM, Earl AM, Comstock LE. 2014. Evidence  
646 of Extensive DNA Transfer between *Bacteroidales* Species within the Human Gut.  
647 *mBio* 5:e01305-14.
- 648 19. Lange A, Beier S, Steimle A, Autenrieth IB, Huson DH, Frick J-S. 2016. Extensive  
649 Mobilome-Driven Genome Diversification in Mouse Gut-Associated *Bacteroides*  
650 *vulgatus* mpk. *Genome Biol Evol* 8:1197–1207.
- 651 20. Yutin N, Makarova KS, Gussow AB, Krupovic M, Segall A, Edwards RA, Koonin  
652 EV. 2018. Discovery of an expansive bacteriophage family that includes the most  
653 abundant viruses from the human gut. *Nat Microbiol* 3:38–46.

- 654 21. Dutilh BE, Cassman N, McNair K, Sanchez SE, Silva GGZ, Boling L, Barr JJ, Speth  
655 DR, Seguritan V, Aziz RK, Felts B, Dinsdale EA, Mokili JL, Edwards RA. 2014. A  
656 highly abundant bacteriophage discovered in the unknown sequences of human faecal  
657 metagenomes. *Nat Commun* 5:1–11.
- 658 22. Shkoporov AN, Khokhlova EV, Fitzgerald CB, Stockdale SR, Draper LA, Ross RP,  
659 Hill C. 2018.  $\Phi$ CrAss001 represents the most abundant bacteriophage family in the  
660 human gut and infects *Bacteroides intestinalis*. *Nat Commun* 9:1–8.
- 661 23. Krinos CM, Coyne MJ, Weinacht KG, Tzianabos AO, Kasper DL, Comstock LE.  
662 2001. Extensive surface diversity of a commensal microorganism by multiple DNA  
663 inversions. *Nature* 414:555–558.
- 664 24. Patrick S, Blakely GW, Houston S, Moore J, Abratt VR, Bertalan M, Cerdeño-  
665 Tárraga AM, Quail MA, Corton N, Corton C, Bignell A, Barron A, Clark L, Bentley  
666 SD, Parkhill J. 2010. Twenty-eight divergent polysaccharide loci specifying within-  
667 and amongst-strain capsule diversity in three strains of *Bacteroides fragilis*.  
668 *Microbiology*, 156:3255–3269.
- 669 25. Tartera C, Jofre J. 1987. Bacteriophages active against *Bacteroides fragilis* in  
670 sewage-polluted waters. *Appl Environ Microbiol* 53:1632–1637.
- 671 26. Jofre J, Blanch AR, Lucena F, Muniesa M. 2014. Bacteriophages infecting  
672 *Bacteroides* as a marker for microbial source tracking. *Water Research* 55:1–11.

- 673 27. Ogilvie LA, Bowler LD, Caplin J, Dedi C, Diston D, Cheek E, Taylor H, Ebdon JE,  
674 Jones BV. 2013. Genome signature-based dissection of human gut metagenomes to  
675 extract subliminal viral sequences. *Nat Commun* 4:1–16.
- 676 28. Minot S, Sinha R, Chen J, Li H, Keilbaugh SA, Wu GD, Lewis JD, Bushman FD.  
677 2011. The human gut virome: Inter-individual variation and dynamic response to  
678 diet. *Genome Res* 21:1616–1625.
- 679 29. Abeles SR, Ly M, Santiago-Rodriguez TM, Pride DT. 2015. Effects of Long Term  
680 Antibiotic Therapy on Human Oral and Fecal Viromes. *PLoS One* 10:e0134941.
- 681 30. Sullivan MB, Coleman ML, Weigele P, Rohwer F, Chisholm SW. 2005. Three  
682 *Prochlorococcus* Cyanophage Genomes: Signature Features and Ecological  
683 Interpretations. *PLoS Biology* 3:e144.
- 684 31. Anantharaman K, Duhaime MB, Breier JA, Wendt KA, Toner BM, Dick GJ. 2014.  
685 Sulfur Oxidation Genes in Diverse Deep-Sea Viruses. *Science* 344:757–760.
- 686 32. Berger P, Kouzel IU, Berger M, Haarmann N, Dobrindt U, Koudelka GB, Mellmann  
687 A. 2019. Carriage of Shiga toxin phage profoundly affects *Escherichia coli* gene  
688 expression and carbon source utilization. *BMC Genomics* 20:504.
- 689 33. Hernandez-Doria JD, Sperandio V. 2018. Bacteriophage Transcription Factor Cro  
690 Regulates Virulence Gene Expression in Enterohemorrhagic *Escherichia coli*. *Cell*  
691 *Host & Microbe* 23:607-617.e6.

- 692 34. Rabinovich L, Sigal N, Borovok I, Nir-Paz R, Herskovits AA. 2012. Prophage  
693 Excision Activates *Listeria* Competence Genes that Promote Phagosomal Escape and  
694 Virulence. *Cell* 150:792–802.
- 695 35. Carey JN, Mettert EL, Fishman-Engel DR, Roggiani M, Kiley PJ, Goulian M. 2019.  
696 Phage integration alters the respiratory strategy of its host. *eLife* 8:e49081.
- 697 36. Chen Y-Y, Wang J-T, Lin T-L, Gong Y-N, Li T-H, Huang Y-Y, Hsieh Y-C. 2019.  
698 Prophage excision in streptococcus pneumoniae serotype 19A ST320 promote  
699 colonization: Insight into its evolution from the ancestral clone Taiwan 19F-14  
700 (ST236). *Frontiers in Microbiology* 10:205.
- 701 37. Nakayama K, Kanaya S, Ohnishi M, Terawaki Y, Hayashi T. 1999. The complete  
702 nucleotide sequence of  $\phi$ CTX, a cytotoxin-converting phage of *Pseudomonas*  
703 *aeruginosa*: implications for phage evolution and horizontal gene transfer via  
704 bacteriophages. *Mol Microbiol* 31:399–419.
- 705 38. Winter SE, Thiennimitr P, Winter MG, Butler BP, Huseby DL, Crawford RW,  
706 Russell JM, Bevins CL, Adams LG, Tsohis RM, Roth JR, Bäumlér AJ. 2010. Gut  
707 inflammation provides a respiratory electron acceptor for *Salmonella*. *Nature*  
708 467:426–429.
- 709 39. Bensing BA, Siboo IR, Sullam PM. 2001. Proteins PblA and PblB of *Streptococcus*  
710 *mitis*, Which Promote Binding to Human Platelets, Are Encoded within a Lysogenic  
711 Bacteriophage. *Infection and Immunity* 69:6186–6192.



- 712 40. Jermyn WS, Boyd EF. 2002. Characterization of a novel *Vibrio* pathogenicity island  
713 (VPI-2) encoding neuraminidase (*nanH*) among toxigenic *Vibrio cholerae* isolates.  
714 *Microbiology*, 148:3681–3693.
- 715 41. Sekulovic O, Fortier L-C. 2015. Global Transcriptional Response of *Clostridium*  
716 *difficile* Carrying the  $\phi$ CD38-2 Prophage. *Appl Environ Microbiol* 81:1364–1374.
- 717 42. Leplae R, Lima-Mendez G, Toussaint A. 2010. ACLAME: A CLAssification of  
718 Mobile genetic Elements, update 2010. *Nucleic Acids Res* 38:D57–D61.
- 719 43. Lima-Mendez G, Van Helden J, Toussaint A, Leplae R. 2008. Prophinder: a  
720 computational tool for prophage prediction in prokaryotic genomes. *Bioinformatics*  
721 24:863–865.
- 722 44. Reyes A, Wu M, McNulty NP, Rohwer FL, Gordon JI. 2013. Gnotobiotic mouse  
723 model of phage–bacterial host dynamics in the human gut. *Proc Nat Acad Sci USA*  
724 110:20236–20241.
- 725 45. Kanehisa M, Goto S. 2000. KEGG: Kyoto Encyclopedia of Genes and Genomes.  
726 *Nucleic Acids Res* 28:27–30.
- 727 46. Yeliseev AA, Kaplan S. 1999. A Novel Mechanism for the Regulation of  
728 Photosynthesis Gene Expression by the TspO Outer Membrane Protein of  
729 *Rhodobacter sphaeroides* 2.4.1. *J Biol Chem* 274:21234–21243.

- 730 47. Davey ME, Bruijn FJ de. 2000. A Homologue of the Tryptophan-Rich Sensory  
731 Protein TspO and FixL Regulate a Novel Nutrient Deprivation-Induced  
732 *Sinorhizobium meliloti* Locus. *Appl Environ Microbiol* 66:5353–5359.
- 733 48. Balsemão-Pires E, Jaillais Y, Olson BJ, Andrade LR, Umen JG, Chory J, Sachetto-  
734 Martins G. 2011. The *Arabidopsis* translocator protein (AtTSPO) is regulated at  
735 multiple levels in response to salt stress and perturbations in tetrapyrrole metabolism.  
736 *BMC Plant Biol* 11:108.
- 737 49. Yao L, Seaton SC, Ndousse-Fetter S, Adhikari AA, DiBenedetto N, Mina AI, Banks  
738 AS, Bry L, Devlin AS. 2018. A selective gut bacterial bile salt hydrolase alters host  
739 metabolism. *eLife*.
- 740 50. Meier-Kolthoff JP, Göker M. 2017. VICTOR: genome-based phylogeny and  
741 classification of prokaryotic viruses. *Bioinformatics* 33:3396–3404.
- 742 51. Göker M, García-Blázquez G, Voglmayr H, Tellería MT, Martín MP. 2009.  
743 Molecular Taxonomy of Phytopathogenic Fungi: A Case Study in *Peronospora*. *PLoS*  
744 *One* 4: e6319.
- 745 52. Northfield TC, McColl I. 1973. Postprandial concentrations of free and conjugated  
746 bile acids down the length of the normal human small intestine. *Gut* 14:513–518.
- 747 53. Hamilton JP, Xie G, Raufman J-P, Hogan S, Griffin TL, Packard CA, Chatfield DA,  
748 Hagey LR, Steinbach JH, Hofmann AF. 2007. Human cecal bile acids: concentration  
749 and spectrum. *Am J Phys-Gastr L* 293:G256–G263.

- 750 54. Citron DM, Baron EJ, Finegold SM, Goldstein EJ. 1990. Short prerduced  
751 anaerobically sterilized (PRAS) biochemical scheme for identification of clinical  
752 isolates of bile-resistant *Bacteroides* species. *J Clin Microbiol* 28:2220–2223.
- 753 55. Joyce SA, MacSharry J, Casey PG, Kinsella M, Murphy EF, Shanahan F, Hill C,  
754 Gahan CGM. 2014. Regulation of host weight gain and lipid metabolism by bacterial  
755 bile acid modification in the gut. *Proc Nat Acad Sci USA* 111:7421–7426.
- 756 56. Grau KR, Zhu S, Peterson ST, Helm EW, Philip D, Phillips M, Hernandez A, Turula  
757 H, Frasse P, Graziano VR, Wilen CB, Wobus CE, Baldrige MT, Karst SM. 2020.  
758 The intestinal regionalization of acute norovirus infection is regulated by the  
759 microbiota via bile acid-mediated priming of type III interferon. *Nature Microbiol*  
760 5:84–92.
- 761 57. Li F, Liu J, Zheng Y, Garavito RM, Ferguson-Miller S. 2015. Crystal structures of  
762 translocator protein (TSPO) and mutant mimic of a human polymorphism. *Science*  
763 347:555–558.
- 764 58. Guo Y, Kalathur RC, Liu Q, Kloss B, Bruni R, Ginter C, Kloppmann E, Rost B,  
765 Hendrickson WA. 2015. Structure and activity of tryptophan-rich TSPO proteins.  
766 *Science* 347:551–555.
- 767 59. Zeno S, Veenman L, Katz Y, Bode J, Gavish M, Zaaroor M. 2012. The 18 kDa  
768 mitochondrial translocator protein (TSPO) prevents accumulation of protoporphyrin  
769 IX. Involvement of reactive oxygen species (ROS). *Curr Mol Med* 12:494–501.

- 770 60. Li F, Liu J, Garavito RM, Ferguson-Miller S. 2015. Evolving understanding of  
771 translocator protein 18kDa (TSPO). *Pharmacol Res* 99:404–409.
- 772 61. Rone MB, Midzak AS, Issop L, Rammouz G, Jagannathan S, Fan J, Ye X, Blonder J,  
773 Veenstra T, Papadopoulos V. 2012. Identification of a Dynamic Mitochondrial  
774 Protein Complex Driving Cholesterol Import, Trafficking, and Metabolism to Steroid  
775 Hormones. *Mol Endocrinol* 26:1868–1882.
- 776 62. Devendran S, Shrestha R, Alves JMP, Wolf PG, Ly L, Hernandez AG, Méndez-  
777 García C, Inboden A, Wiley J, Paul O, Allen A, Springer E, Wright CL, Fields CJ,  
778 Daniel SL, Ridlon JM. 2019. *Clostridium scindens* ATCC 35704: Integration of  
779 Nutritional Requirements, the Complete Genome Sequence, and Global  
780 Transcriptional Responses to Bile Acids. *Appl Environ Microbiol* 85.
- 781 63. Roberts JW, Roberts CW, Craig NL. 1978. *Escherichia coli recA* gene product  
782 inactivates phage lambda repressor. *Proc Nat Acad Sci USA* 75:4714–4718.
- 783 64. Moon K, Shoemaker NB, Gardner JF, Salyers AA. 2005. Regulation of Excision  
784 Genes of the *Bacteroides* Conjugative Transposon CTnDOT. *Journal of Bacteriology*  
785 187:5732–5741.
- 786 65. Puig M, Gironés R. 1999. Genomic structure of phage B40-8 of *Bacteroides fragilis*.  
787 *Microbiol*, 145:1661–1670.
- 788 66. Salyers AA, Bonheyo G, Shoemaker NB. 2000. Starting a New Genetic System:  
789 Lessons from *Bacteroides*. *Methods* 20:35–46.

- 790 67. Oh J-H, Lin XB, Zhang S, Tollenaar SL, Özçam M, Dunphy C, Walter J, Pijkeren J-P  
791 van. 2019. Prophages in *Lactobacillus reuteri* Are Associated with Fitness Trade-  
792 Offs but Can Increase Competitiveness in the Gut Ecosystem. *Appl Environ*  
793 *Microbiol* 86.
- 794 68. Zhao S, Lieberman TD, Poyet M, Kauffman KM, Gibbons SM, Groussin M, Xavier  
795 RJ, Alm EJ. 2019. Adaptive Evolution within Gut Microbiomes of Healthy People.  
796 *Cell Host Microbe* 25:656-667.e8.
- 797 69. Holdeman LV, Cato EP, Moore WEC. 1977. *Anaerobic Laboratory Manual*, 4th  
798 Edition. Anaerobe Laboratory, Virginia Polytechnic Institute and State University,  
799 Blacksburg.
- 800 70. Goodman AL, McNulty NP, Zhao Y, Leip D, Mitra RD, Lozupone CA, Knight R,  
801 Gordon JI. 2009. Identifying Genetic Determinants Needed to Establish a Human Gut  
802 Symbiont in Its Habitat. *Cell Host & Microbe* 6:279–289.
- 803 71. Koropatkin NM, Martens EC, Gordon JI, Smith TJ. 2008. Starch Catabolism by a  
804 Prominent Human Gut Symbiont Is Directed by the Recognition of Amylose Helices.  
805 *Structure* 16:1105–1115.
- 806 72. Degnan PH, Taga ME, Goodman AL. 2014. Vitamin B12 as a Modulator of Gut  
807 Microbial Ecology. *Cell Metab* 20:769–778.
- 808 73. Deatherage DE, Barrick JE. 2014. Identification of mutations in laboratory-evolved  
809 microbes from next-generation sequencing data using breseq. *Methods Mol Biol*  
810 1151:165–188.

- 811 74. Riley AB, Kim D, Hansen AK. 2017. Genome Sequence of “*Candidatus Carsonella*  
812 *ruddii*” Strain BC, a Nutritional Endosymbiont of *Bactericera cockerelli*. *Genome*  
813 *Announc* 5:e00236-17.
- 814 75. Hyatt D, Chen G-L, LoCascio PF, Land ML, Larimer FW, Hauser LJ. 2010.  
815 Prodigal: prokaryotic gene recognition and translation initiation site identification.  
816 *BMC Bioinformatics* 11:119.
- 817 76. Lowe TM, Eddy SR. 1997. tRNAscan-SE: A Program for Improved Detection of  
818 Transfer RNA Genes in Genomic Sequence. *Nucleic Acids Res* 25:955–964.
- 819 77. Lagesen K, Hallin P, Rødland EA, Stærfeldt H-H, Rognes T, Ussery DW. 2007.  
820 RNAmmer: consistent and rapid annotation of ribosomal RNA genes. *Nucleic Acids*  
821 *Res* 35:3100–3108.
- 822 78. Nawrocki EP, Eddy SR. 2013. Infernal 1.1: 100-fold faster RNA homology searches.  
823 *Bioinformatics* 29:2933–2935.
- 824 79. Tatusov RL, Fedorova ND, Jackson JD, Jacobs AR, Kiryutin B, Koonin EV, Krylov  
825 DM, Mazumder R, Mekhedov SL, Nikolskaya AN, Rao BS, Smirnov S, Sverdlov  
826 AV, Vasudevan S, Wolf YI, Yin JJ, Natale DA. 2003. The COG database: an updated  
827 version includes eukaryotes. *BMC Bioinformatics* 4:41.
- 828 80. Bateman A, Coin L, Durbin R, Finn RD, Hollich V, Griffiths-Jones S, Khanna A,  
829 Marshall M, Moxon S, Sonnhammer ELL, Studholme DJ, Yeats C, Eddy SR. 2004.  
830 The Pfam protein families database. *Nucleic Acids Res* 32:D138–D141.

- 831 81. Haft DH, Selengut JD, White O. 2003. The TIGRFAMs database of protein families.  
832 Nucleic Acids Res 31:371–373.
- 833 82. Yu C-S, Cheng C-W, Su W-C, Chang K-C, Huang S-W, Hwang J-K, Lu C-H. 2014.  
834 CELLO2GO: A Web Server for Protein subCELLular LOCALization Prediction with  
835 Functional Gene Ontology Annotation. PLoS ONE 9:e99368.
- 836 83. Carver T, Harris SR, Berriman M, Parkhill J, McQuillan JA. 2012. Artemis: an  
837 integrated platform for visualization and analysis of high-throughput sequence-based  
838 experimental data. Bioinformatics 28:464–469.
- 839 84. Mount DW. 2007. Using the Basic Local Alignment Search Tool (BLAST). Cold  
840 Spring Harb Protoc 2007:pdb.top17.
- 841 85. Benson DA, Karsch-Mizrachi I, Lipman DJ, Ostell J, Sayers EW. 2009. GenBank.  
842 Nucleic Acids Res 37:D26–D31.
- 843 86. Kelley LA, Mezulis S, Yates CM, Wass MN, Sternberg MJE. 2015. The Phyre2 web  
844 portal for protein modeling, prediction and analysis. Nat Protoc 10:845–858.
- 845 87. Seguritan V, Jr NA, Arnoult M, Raymond A, Lorimer D, Jr ABB, Salamon P, Segall  
846 AM. 2012. Artificial Neural Networks Trained to Detect Viral and Phage Structural  
847 Proteins. PLoS Comput Biol 8:e1002657.
- 848 88. McClure R, Balasubramanian D, Sun Y, Bobrovskyy M, Sumby P, Genco CA,  
849 Vanderpool CK, Tjaden B. 2013. Computational analysis of bacterial RNA-Seq data.  
850 Nucleic Acids Res 41:e140–e140.

- 851 89. Bolger AM, Lohse M, Usadel B. 2014. Trimmomatic: a flexible trimmer for Illumina  
852 sequence data. *Bioinformatics* 30:2114–2120.
- 853 90. Nurk S, Meleshko D, Korobeynikov A, Pevzner PA. 2017. metaSPAdes: a new  
854 versatile metagenomic assembler. *Genome Res* 27:824–834.
- 855 91. Li H, Durbin R. 2009. Fast and accurate short read alignment with Burrows–Wheeler  
856 transform. *Bioinformatics* 25:1754–1760.
- 857 92. Edgar RC. 2004. MUSCLE: multiple sequence alignment with high accuracy and  
858 high throughput. *Nucleic Acids Res* 32:1792–1797.
- 859 93. Price MN, Dehal PS, Arkin AP. 2010. FastTree 2 – Approximately Maximum-  
860 Likelihood Trees for Large Alignments. *PLOS ONE* 5:e9490.
- 861 94. Noguchi H, Taniguchi T, Itoh T. 2008. MetaGeneAnnotator: Detecting Species-  
862 Specific Patterns of Ribosomal Binding Site for Precise Gene Prediction in  
863 Anonymous Prokaryotic and Phage Genomes. *DNA Res* 15:387–396.
- 864 95. Roux S, Enault F, Hurwitz BL, Sullivan MB. 2015. VirSorter: mining viral signal  
865 from microbial genomic data. *PeerJ* 3:e985.
- 866 96. Simon R, Priefer U, Pühler A. 1983. A Broad Host Range Mobilization System for In  
867 Vivo Genetic Engineering: Transposon Mutagenesis in Gram Negative Bacteria. *Nat*  
868 *Biotechnol* 1:784–791.
- 869 97. Eggerth AH, Gagnon BH. 1933. The *Bacteroides* of Human Feces. *Journal of*  
870 *Bacteriology* 25:389–413.



- 871 98. Johnson JL. 1978. Taxonomy of the *Bacteroides*. International Journal of Systematic  
872 and Evolutionary Microbiology, 28:245–256.
- 873 99. Whittle G, Hund BD, Shoemaker NB, Salyers AA. 2001. Characterization of the 13-  
874 Kilobase *ermF* Region of the *Bacteroides* Conjugative Transposon CTnDOT. Appl  
875 Environ Microbiol 67:3488–3495.
- 876 100. Shoemaker NB, Vlamakis H, Hayes K, Salyers AA. 2001. Evidence for Extensive  
877 Resistance Gene Transfer among *Bacteroides* spp. and among *Bacteroides* and Other  
878 Genera in the Human Colon. Appl Environ Microbiol 67:561–568.
- 879 101. Caporaso JG, Lauber CL, Walters WA, Berg-Lyons D, Lozupone CA, Turnbaugh  
880 PJ, Fierer N, Knight R. 2011. Global patterns of 16S rRNA diversity at a depth of  
881 millions of sequences per sample. PNAS 108:4516–4522.

882

### 883 **FIGURE LEGENDS**

884 **Figure 1. DNA sequencing reads mapped to the BV01 prophage region.** Reads from  
885 shotgun sequencing of *B. vulgatus* genomic DNA (WT) or isolated phage DNA (Free  
886 BV01) were normalized to the total number of reads after trimming, and represented as a  
887 coverage curve. A cured lysogen ( $\Delta$ BV01) and integrase deletion mutant ( $\Delta$ *int*) of *B.*  
888 *vulgatus* were confirmed by shotgun sequencing of genomic DNA. The discrete coverage  
889 peak at position ~3,588,000 nt from  $\Delta$ BV01 is attributed to a homologous sequence  
890 elsewhere on the *B. vulgatus* chromosome. Putative functions of BV01 genes are  
891 indicated by the colors in the legend.

892

893 **Figure 2. Prophage BV01 is an intact prophage.** (A) Excision and circularization  
894 activities of the BV01 integrase are confirmed by PCR. The presence of phage DNA was  
895 detected by amplification of a phage marker gene (BVU\_RS14350). Amplification across  
896 the phage attachment site (*attP*) indicates circularization of the BV01 genome; *attP*  
897 amplicons from the integrase complement strain ( $\Delta int + pNBU2-int$ ) are ~1.2 Kb shorter  
898 than wild-type amplicons due to deletion of the integrase gene. Supernatant fractions  
899 were treated with DNase, eliminating all contaminating host genomic DNA, as  
900 demonstrated by the amplification of a host marker gene (16S rRNA). Note that despite  
901 apparent size shift of BVU\_RS14350 amplicons from the pellets and supernatants,  
902 Sanger sequencing validated that the products are in fact identical. PCR amplicons were  
903 visualized by agarose gel electrophoresis alongside NEB 1 Kb DNA ladder  
904 (BVU\_RS14350, *attP*) or GeneRuler Express DNA ladder (16S rRNA); ladder band sizes  
905 shown in Kb. (B) BV01 can transduce uninfected hosts in a gnotobiotic mouse. Germ-  
906 free mice ( $n=7$ ) were gavaged with an equal mixture of a BV01-*tetQ* lysogen and an  
907 erythromycin-tagged cured lysogen (Day 0). Recipient, donor, and transductant cells  
908 were identified by plating on Brain Heart Infusion (BHI) media with antibiotic selection:  
909 erythromycin (Erm) or tetracycline (Tet).

910

911 **Figure 3. Differential regulation of the host transcriptome in response to BV01**  
912 **lysogeny.** (A) Count of differentially regulated transcripts as compared to the wild-type  
913 *B. vulgatus* lysogen (fold change  $\geq 2$ ,  $q$ -value  $\leq 0.01$ ). (B) Chromosomal localization of  
914 the differentially expressed genes. Each dot represents a differentially expressed  
915 transcript on a  $\log_2$  scale; genes below the 2-fold change cutoff (yellow) and within the

916 BV01 prophage (blue) not shown. Positive fold change values correspond to increased  
917 transcription in the second background listed. (C) General functional assignment of genes  
918 differentially expressed between wild-type and cured lysogen strains was accomplished  
919 using the Clusters of Orthologous Groups (COGs). Transcripts which are not  
920 differentially expressed in other strain comparisons are shown in black. *tspO*-dependent  
921 transcripts are marked on right (•). Positive fold change values correspond to increased  
922 transcription in the second background listed. Letters correspond to COG categories: cell  
923 wall/membrane/envelope biogenesis (M), post-translation modification, protein turnover,  
924 and chaperones (O), signal transduction mechanisms (T), transcription (K), energy  
925 production and conversion (C), amino acid transport and metabolism (E), carbohydrate  
926 transport and metabolism (G), coenzyme transport and metabolism (H), lipid transport  
927 and metabolism (I), inorganic ion transport and metabolism (P), secondary metabolite  
928 biosynthesis, transport, and catabolism (Q), general function prediction only (R), function  
929 unknown (S).

930

931 **Figure 4. BV01 integration disrupts transcription of *tspO*.** (A) Transcriptional activity  
932 of the *tspO* gene region as it exists in the cured lysogen background. RNAseq reads from  
933 wild-type (WT) and cured lysogen ( $\Delta$ BV01) *B. vulgatus* were mapped to the region, and  
934 coverage was normalized to the total number of reads mapping to the genome. The  
935 average normalized read coverage for each genome is displayed as the y-axis maximum  
936 (grey line). Maximum read coverage for the region is displayed as the grey dashed line.  
937 (B) Amino acid alignment of *B. vulgatus* TspO with known TspO sequences was  
938 generated with MUSCLE (92). Identical and similar residues are colored blue and gray,

939 respectively. Shown are TspO protein sequences from *B. vulgatus* (WP\_005843416.1),  
940 *Bacillus cereus* (GCF80909.1), *Rhodobacter sphaeroides* (AAF24291.1), *Sinorhizobium*  
941 *meliloti* (AAF01195.1), human (NP\_001243460.1), and rat (NP\_036647.1). Secondary  
942 structures, cholesterol recognition/interaction amino acid consensus (CRAC) sequence,  
943 and critical residues (•) from *R. sphaeroides* TspO crystal structure are shown (57). (C)  
944 The search for TspO homologs in the family *Bacteroidales* was accomplished with a  
945 BLAST-based approach, using the *Bacillus cereus* copy of TspO (GCF80909.1) as a  
946 query against a database of 154 gut-associated *Bacteroidales* genomes, 122 of which are  
947 from the genus *Bacteroides*. Genome counts are indicated within categories. (D) Gene  
948 tree estimated from TspO sequences across the *Bacteroidales*. All *B. vulgatus* and *B.*  
949 *dorei* genomes included in the search encode *tspO*. Clade for *B. vulgatus* TspO sequences  
950 is displayed as a polytomy; all *B. vulgatus* TspO sequences are at least 98% identical to  
951 each other. Numbers above branches represent bootstrap values; only bootstraps over 50  
952 shown. The gene tree was estimated using FastTree (93).

953

954 **Figure 5. BV01 alters host interactions with bile acids in a *tspO*-dependent manner.**

955 (A) Representative LC/MS traces showing *B. vulgatus* deconjugates taurocholic acid  
956 (TCA) to cholic acid (CA) in the cured lysogen background ( $\Delta$ BV01), but little or no  
957 activity CA is detectable in the wild-type (WT) or cured lysogen *tspO* deletion  
958 ( $\Delta$ BV01 $\Delta$ *tspO*) backgrounds. *B. vulgatus* cultures were incubated with 50  $\mu$ M TCA for  
959 16 hr prior to bile acid extraction. (B) Representative LC/MS traces showing *B. vulgatus*  
960 deconjugates glycocholic acid (GCA) to CA in the  $\Delta$ BV01 background, but not in the  
961 WT or  $\Delta$ BV01 $\Delta$ *tspO* backgrounds. *B. vulgatus* cultures were incubated with 50  $\mu$ M GCA

962 for 48 hr prior to bile acid extraction. Nordeoxycholic acid (norDCA) was added to a  
963 final concentration of 15  $\mu$ M as an internal standard after incubation. Peaks labeled for  
964 their metabolites based on m/z; TCA = 514.29, GCA = 464.30, CA = 407.28, norDCA =  
965 377.27.

966

967 **Figure 6. *Salyersviridae* occur throughout the *Bacteroides* genus.** (A) *Bacteroides*  
968 phylogeny and occurrence of *Salyersviridae att* site. All duplications of the *att* site are  
969 associated with a putative integrated prophage. Host phylogeny estimated by maximum  
970 likelihood from concatenated alignment of 13 core genes. (B) Consensus *att* site for  
971 *Salyersvirinae*. The *attP* is duplicated upon integration of a *Salyersvirinae* prophage,  
972 resulting in direct repeats. Image made with the WebLogo online tool. (C) Phylogenomic  
973 Genome-BLAST Distance Phylogeny implemented with the VCTOR online tool (50)  
974 using amino acid data from all phage ORFs. For consistency, all phage genomes were  
975 annotated with MetaGeneAnnotator (94) implemented via VirSorter (95). Support values  
976 above branches are GBDP pseudo-bootstrap values from 100 replications. Family (F),  
977 subfamily (Subf), genus (G), and species (Sp) assigned by OPTSIL clustering (51) (Table  
978 1). Each leaf of the tree represents a unique phage species, except where indicated by  
979 colored boxes. Active prophages confirmed by sequencing and/or PCR indicated with  
980 “•”; prophages confirmed to have been inactivated by genome rearrangement indicated  
981 with “x”; prophages which were tested for activity with inconclusive results indicated  
982 with “\*” (Fig. S4).

983

984 **TABLES**

985 **Table 1. *Bacteroides* phage taxonomy as determined by whole genome clustering.**

| Phage | Host                 | Family                | Subfamily             | Genus               | Species     |
|-------|----------------------|-----------------------|-----------------------|---------------------|-------------|
|       | <i>B. vulgatus</i>   |                       |                       |                     |             |
| BV01  | ATCC 8482            | <i>Salyersviridae</i> | <i>Salyersvirinae</i> | <i>Salyersvirus</i> | <i>BV01</i> |
|       | <i>B. vulgatus</i>   |                       |                       |                     |             |
| BV02  | VPI-4245             | <i>Salyersviridae</i> | <i>Salyersvirinae</i> | <i>Salyersvirus</i> | <i>BV02</i> |
|       | <i>B. vulgatus</i>   |                       |                       |                     |             |
| BV03  | VPI-2365             | <i>Salyersviridae</i> | <i>Salyersvirinae</i> | <i>Salyersvirus</i> | <i>BV03</i> |
|       | <i>B. vulgatus</i>   |                       |                       |                     |             |
| BV04  | VPI-6186             | <i>Salyersviridae</i> | <i>Salyersvirinae</i> | <i>Salyersvirus</i> | <i>BV04</i> |
|       | <i>B. vulgatus</i>   |                       |                       |                     |             |
| BV05  | VPI-5710             | <i>Salyersviridae</i> | <i>Salyersvirinae</i> | <i>Salyersvirus</i> | <i>BV05</i> |
|       | <i>B. vulgatus</i>   |                       |                       |                     |             |
| BV06  | DH4096S              | <i>Salyersviridae</i> | <i>Salyersvirinae</i> | <i>Salyersvirus</i> | <i>BV06</i> |
|       | <i>B. finegoldii</i> |                       |                       |                     |             |
| BF01  | CL09T03C10           | <i>Salyersviridae</i> | <i>Salyersvirinae</i> | <i>Salyersvirus</i> | <i>BF01</i> |
|       | <i>Bacteroides</i>   |                       |                       |                     |             |
| BT01  | sp. 1_1_6            | <i>Salyersviridae</i> | <i>Salyersvirinae</i> | <i>Salyersvirus</i> | <i>BX01</i> |
|       | <i>B. ovatus</i>     |                       |                       |                     |             |
| BO01  | ATCC 8483            | <i>Salyersviridae</i> | <i>Salyersvirinae</i> | <i>Salyersvirus</i> | <i>BO01</i> |
|       | <i>B. ovatus</i>     |                       |                       |                     |             |
| BO02  | CL02T12C04           | <i>Salyersviridae</i> | <i>Salyersvirinae</i> | <i>Salyersvirus</i> | <i>BO02</i> |
| BO03  | <i>Bacteroides</i>   | <i>Salyersviridae</i> | <i>Salyersvirinae</i> | <i>Salyersvirus</i> | <i>BO03</i> |

|                      |                    |                       |                       |                     |             |
|----------------------|--------------------|-----------------------|-----------------------|---------------------|-------------|
| <i>sp. 2_2_4</i>     |                    |                       |                       |                     |             |
| <i>Bacteroides</i>   |                    |                       |                       |                     |             |
| BO04                 | sp. D2             | <i>Salyersviridae</i> | <i>Salyersvirinae</i> | <i>Salyersvirus</i> | <i>BO04</i> |
| <i>B.</i>            |                    |                       |                       |                     |             |
| <i>xylanisolvens</i> |                    |                       |                       |                     |             |
| BX01                 | XB1A               | <i>Salyersviridae</i> | <i>Salyersvirinae</i> | <i>Salyersvirus</i> | <i>BX01</i> |
| <i>Bacteroides</i>   |                    |                       |                       |                     |             |
| BX02                 | sp. D1             | <i>Salyersviridae</i> | <i>Salyersvirinae</i> | <i>Salyersvirus</i> | <i>BX02</i> |
| <i>Bacteroides</i>   |                    |                       |                       |                     |             |
| BX03                 | sp. 2_1_22         | <i>Salyersviridae</i> | <i>Salyersvirinae</i> | <i>Salyersvirus</i> | <i>BX02</i> |
| <i>B. ovatus</i> SD  |                    |                       |                       |                     |             |
| BX04                 | CC 2a              | <i>Salyersviridae</i> | <i>Salyersvirinae</i> | <i>Salyersvirus</i> | <i>BX02</i> |
| <i>B.</i>            |                    |                       |                       |                     |             |
| <i>xylanisolvens</i> |                    |                       |                       |                     |             |
| BX05                 | SD CC 1b           | <i>Salyersviridae</i> | <i>Salyersvirinae</i> | <i>Salyersvirus</i> | <i>BX02</i> |
| <i>Bacteroides</i>   |                    |                       |                       |                     |             |
| BX06                 | sp. D22            | <i>Salyersviridae</i> | <i>Salyersvirinae</i> | <i>Salyersvirus</i> | <i>BX06</i> |
| <i>B. ovatus</i> SD  |                    |                       |                       |                     |             |
| BX07                 | CMC 3f             | <i>Salyersviridae</i> | <i>Salyersvirinae</i> | <i>Salyersvirus</i> | <i>BX07</i> |
| <i>B. clarus</i> YIT |                    |                       |                       |                     |             |
| BC01                 | 12056              | <i>Salyersviridae</i> | ?                     | ?                   | <i>BC01</i> |
| <i>B124-</i>         |                    |                       |                       |                     |             |
| B124-14              | <i>B. fragilis</i> | <i>Salyersviridae</i> | ?                     | ?                   | <i>14</i>   |

|            |                        |                       |   |   |       |
|------------|------------------------|-----------------------|---|---|-------|
| B40-8      | <i>B. fragilis</i>     | <i>Salyersviridae</i> | ? | ? | B40-8 |
| crAssphage | <i>B. intestinalis</i> | ?                     | ? | ? | ?     |

986

## 987 SUPPLEMENTARY FIGURE LEGENDS

988 **Figure S1. Transcriptional activity of the BV01 prophage and surrounding**  
989 **chromosome.** RNAseq reads from wild-type lysogen (WT) and cured lysogen ( $\Delta$ BV01)  
990 strains were mapped to the region, and coverage was normalized to the total number of  
991 reads mapping to the genome. One representative of three replicates shown for each. The  
992 average normalized read coverage for each genome is displayed as the y-axis maximum  
993 (grey line). Maximum read coverage for the region is indicated on the y-axis. Forward  
994 reads (red) and reverse reads (blue) were plotted separately. Locations of two putative  
995 BV01-encoded transcriptional regulators are indicated (BVU\_RS14235,  
996 BVU\_RS14475).

997

## 998 **Figure S2. Prevalence of prophage insertion adjacent to *tspO* in human gut samples.**

999 Reads from 256 healthy human gut metagenomes were obtained from the Human  
1000 Microbiome Project Healthy Human Subjects Study. (A) Reads were first mapped to  
1001 representative sequences of *tspO* from *B. vulgatus* and *B. dorei*. Percent abundance *tspO*  
1002 reads was calculated on a per sample basis as the number of reads mapping to *tspO*  
1003 divided by the total number of reads. Histogram shows counts of samples. (B) Reads  
1004 mapping to *tspO* were filtered to only include reads antisense to *tspO*, predicted to point  
1005 toward the *attB* based on the known genomic architecture. Mates to those reads were  
1006 subsequently mapped to BV01 and its *Salyersvirus* relatives (Fig. 6). Only samples with



1007 read pairs bridging *tspO* and a phage sequence are shown ( $n=34$ ). Percent *tspO* reads  
1008 mated with *Salyersvirus* reads was calculated as the read pairs bridging *tspO* and a phage  
1009 sequence divided by the total number of reads mapping antisense to *tspO*. Histogram  
1010 shows counts of samples.

1011

1012 **Figure S3. Paired whole genome tree and nucleotide alignment of *Salyersviridae***  
1013 **phages.** Phylogenomic Genome-BLAST Distance Phylogeny implemented with the  
1014 VCTOR online tool (50) using amino acid data from all phage ORFs. For consistency, all  
1015 phage genomes were annotated with MetaGeneAnnotator (94) implemented via VirSorter  
1016 (95). Support values above branches are GBDP pseudo-bootstrap values from 100  
1017 replications. Genome alignment of all phages made with MAUVE. One locally collinear  
1018 block (LCB) connects phages B124-14 and B40-8 to the *Salyersviridae* at the nucleotide  
1019 level (green). Other LCB connecting lines removed for clarity.

1020

1021 **Figure S4. Confirmation of activity of three additional *Salyersviruses*.** DNase-treated  
1022 culture supernatants for predicted *Salyersviruses* BV02 (A), BV04 (B), and BV05 (C)  
1023 were sequenced. Assembly resulted in contigs corresponding to the free form of phages  
1024 BV02 and BV05; BV04 did not yield any contigs corresponding to the putative prophage  
1025 region, suggesting it is inactivated. Assembled free phage contigs were aligned to their  
1026 integrated prophage region with Mauve (A-C). Sequence reads were mapped back to  
1027 their free and integrated forms and represented as coverage curves (A-C). Vertical orange  
1028 lines indicate the location of *att* sequences; vertical dashed blue lines indicate the location  
1029 of contig breaks. (D) PCR amplification with phage-specific primers tests for phage

1030 presence in pellet and supernatant fractions for 7 predicted Salyersviruses. Supernatant  
1031 fractions were treated with DNase, eliminating all contaminating host genomic DNA, as  
1032 demonstrated by the amplification of a host marker gene (16S rRNA). BV04 is not  
1033 detectable in supernatant, supporting the conclusion that it is an inactivated prophage.  
1034 PCR amplicons were visualized by agarose gel electrophoresis alongside GeneRuler  
1035 Express DNA ladder (16S rRNA); ladder band sizes shown in Kb.

1036

1037 **Figure S5. *Salyersviridae* sequence is detectable in human-associated samples.** (A)  
1038 Wastewater viromes were collected, and processed in three ways prior to sequencing (see  
1039 Methods). Resulting reads were trimmed, pooled, and mapped to all *Salyersviridae*  
1040 genomes and crAssphage. Only *Salyersvirinae* genomes shown in alignment to better  
1041 demonstrate conservation, constructed with Mauve. Read coverages normalized to total  
1042 number of reads in the metavirome. The maximum normalized read coverage for BC01 is  
1043 4.1, B40-8 and B124-14 is 1.13, and crAssphage is 7.33. (B) Reads from 256 healthy  
1044 human gut metagenomes were obtained from the Human Microbiome Project Healthy  
1045 Human Subjects Study. Reads were mapped to all 20 temperate *Salyersviridae* phages  
1046 and crAssphage. Percent reads mapping was calculated on a per sample basis as the  
1047 number of reads mapping to any virus divided by the total number of reads. Histogram  
1048 shows counts of samples.

1049

#### 1050 **SUPPLEMENTARY TABLE TITLES**

1051 **Table S1.** Rockhopper results for RNAseq from *B. vulgatus* WT (602),  $\Delta$ BV01 (853) and  
1052  $\Delta$ BV01 $\Delta$ tspO (1662).

1053

1054 **Table S2.** Detection of *Salyersviridae* in Human Microbiome Project Healthy Human

1055 Subjects Study samples.

1056

1057 **Table S3.** Bacterial strains, plasmids, and primers used in this study.

1058

1059 **Table S4.** Breseq read mapping results of *B. vulgatus* WT and mutant strains used in this  
1060 study.

1061

1062 **Table S5.** DNA sequencing data generated for *B. vulgatus* isolates, cell-free  
1063 *Salyersviridae* phages, and wastewater viromes used in this study.

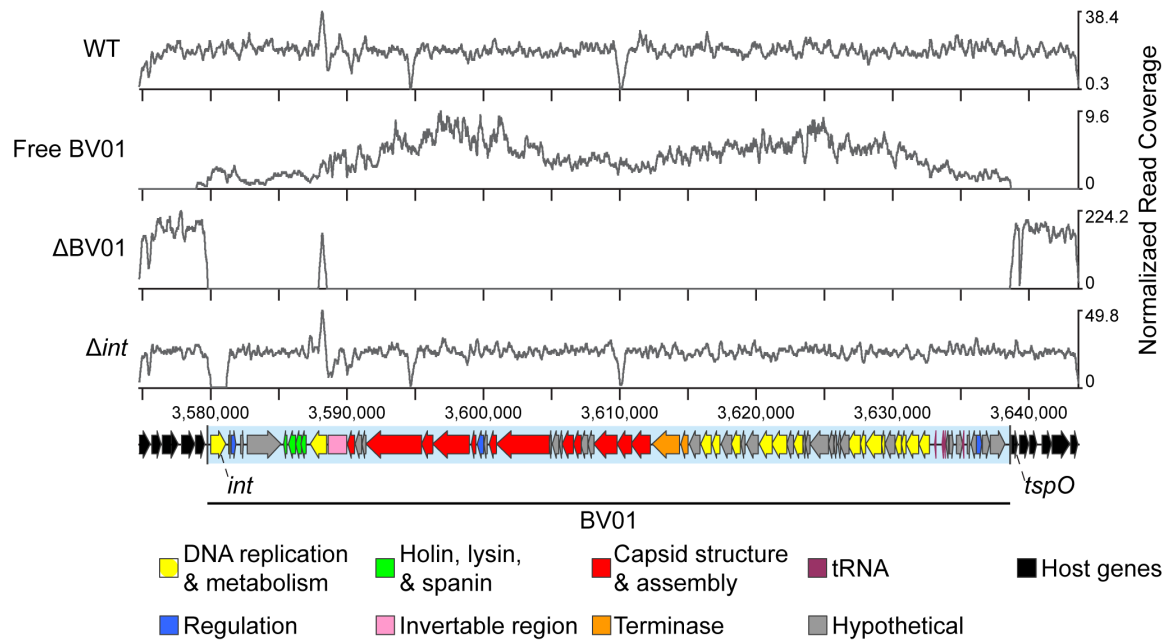

**Figure 1. DNA sequencing reads mapped to the BV01 prophage region.** Reads from shotgun sequencing of *B. vulgatus* genomic DNA (WT) or isolated phage DNA (Free BV01) were normalized to the total number of reads after trimming, and represented as a coverage curve. A cured lysogen ( $\Delta$ BV01) and integrase deletion mutant ( $\Delta$ int) of *B. vulgatus* were confirmed by shotgun sequencing of genomic DNA. The discrete coverage peak at position  $\sim$ 3,588,000 nt from  $\Delta$ BV01 is attributed to a homologous sequence elsewhere on the *B. vulgatus* chromosome. Putative functions of BV01 genes are indicated by the colors in the legend.

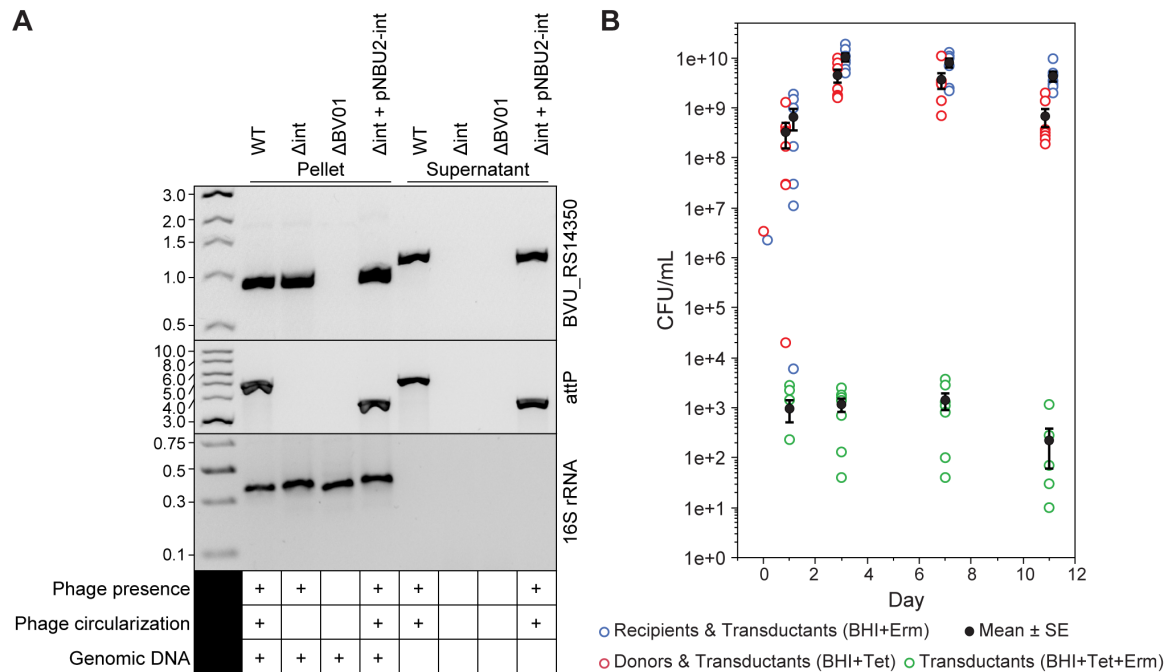

**Figure 2. Prophage BV01 is an intact prophage.** (A) Excision and circularization activities of the BV01 integrase are confirmed by PCR. The presence of phage DNA was detected by amplification of a phage marker gene (BVU\_RS14350). Amplification across the phage attachment site (*attP*) indicates circularization of the BV01 genome; *attP* amplicons from the integrase complement strain ( $\Delta int + pNBU2-int$ ) are  $\sim 1.2$  Kb shorter than wild-type amplicons due to deletion of the integrase gene. Supernatant fractions were treated with DNase, eliminating all contaminating host genomic DNA, as demonstrated by the amplification of a host marker gene (16S rRNA). Note that despite apparent size shift of BVU\_RS14350 amplicons from the pellets and supernatants, Sanger sequencing validated that the products are in fact identical. PCR amplicons were visualized by agarose gel electrophoresis alongside NEB 1 Kb DNA ladder (BVU\_RS14350, *attP*) or GeneRuler Express DNA ladder (16S rRNA); ladder band sizes shown in Kb. (B) BV01 can transduce uninfected hosts in a gnotobiotic mouse. Germ-free mice ( $n=7$ ) were gavaged with an equal mixture of a BV01-*tetQ* lysogen and an erythromycin-tagged cured

lysogen (Day 0). Recipient, donor, and transductant cells were identified by plating on Brain Heart Infusion (BHI) media with antibiotic selection: erythromycin (Erm) or tetracycline (Tet).

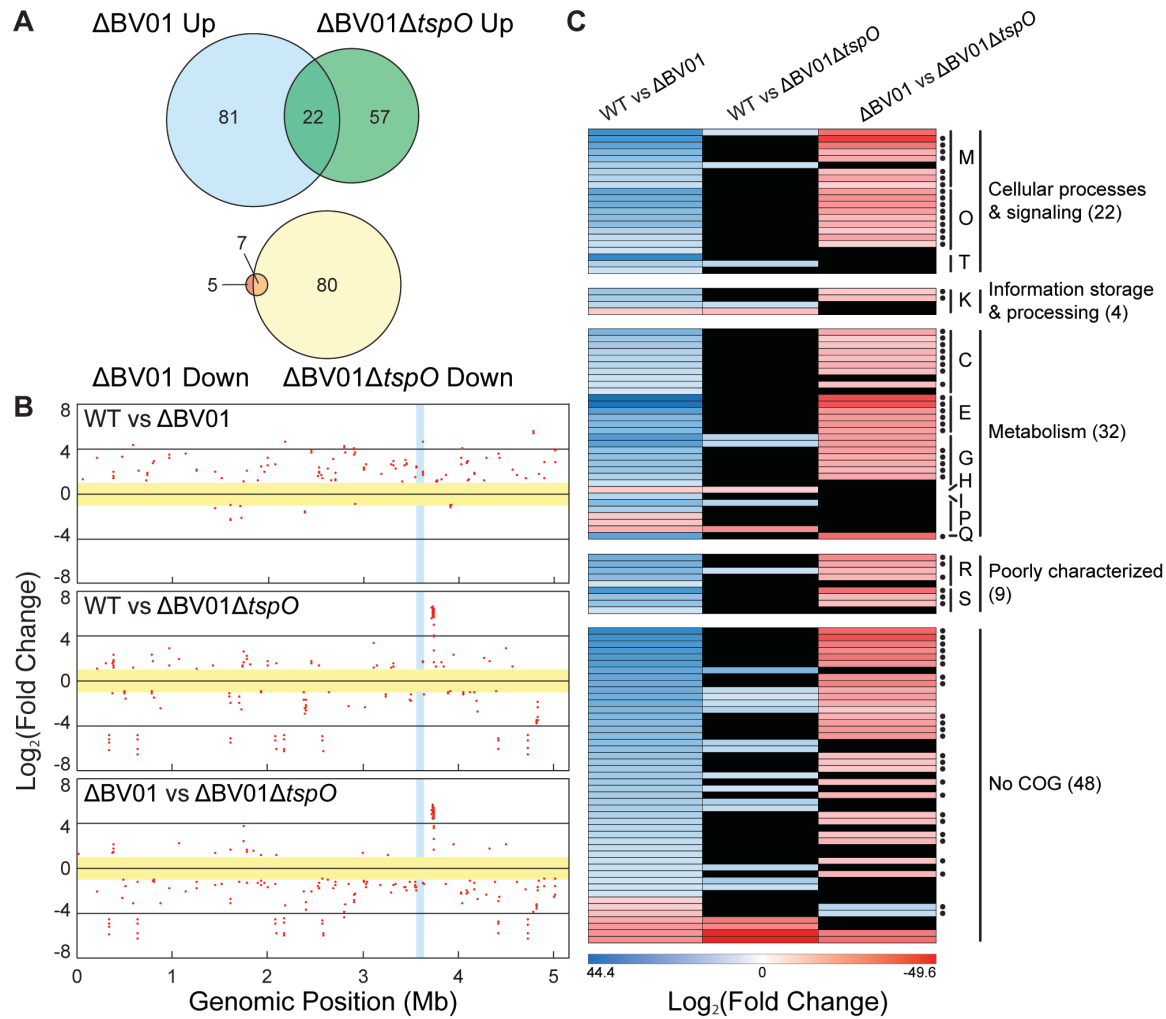

**Figure 3. Differential regulation of the host transcriptome in response to BV01 lysogeny.** (A) Count of differentially regulated transcripts as compared to the wild-type *B. vulgatus* lysogen (fold change  $\geq 2$ ,  $q$ -value  $\leq 0.01$ ). (B) Chromosomal localization of the differentially expressed genes. Each dot represents a differentially expressed transcript on a log<sub>2</sub> scale; genes below the 2-fold change cutoff (yellow) and within the BV01 prophage (blue) not shown. Positive fold change values correspond to increased transcription in the second background listed. (C) General functional assignment of genes differentially expressed between wild-type and cured lysogen strains was accomplished using the Clusters of Orthologous Groups (COGs). Transcripts which are not differentially expressed in other strain comparisons are shown in black. *tspO*-dependent

transcripts are marked on right (•). Positive fold change values correspond to increased transcription in the second background listed. Letters correspond to COG categories: cell wall/membrane/envelope biogenesis (M), post-translation modification, protein turnover, and chaperones (O), signal transduction mechanisms (T), transcription (K), energy production and conversion (C), amino acid transport and metabolism (E), carbohydrate transport and metabolism (G), coenzyme transport and metabolism (H), lipid transport and metabolism (I), inorganic ion transport and metabolism (P), secondary metabolite biosynthesis, transport, and catabolism (Q), general function prediction only (R), function unknown (S).



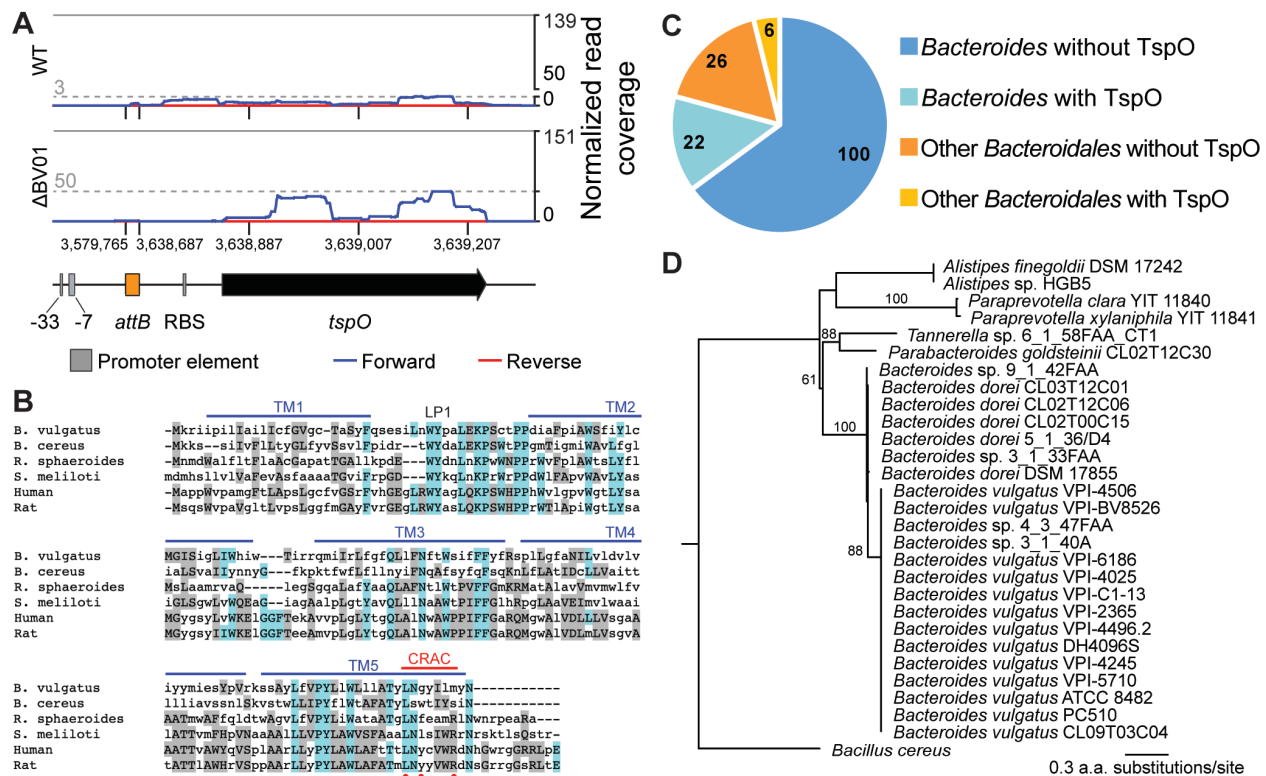

**Figure 4. BV01 integration disrupts transcription of *tspO*.** (A) Transcriptional activity of the *tspO* gene region as it exists in the cured lysogen background. RNAseq reads from wild-type (WT) and cured lysogen ( $\Delta$ BV01) *B. vulgatus* were mapped to the region, and coverage was normalized to the total number of reads mapping to the genome. The average normalized read coverage for each genome is displayed as the y-axis maximum (grey line). Maximum read coverage for the region is displayed as the grey dashed line. (B) Amino acid alignment of *B. vulgatus* TspO with known TspO sequences was generated with MUSCLE (49). Identical and similar residues are colored blue and gray, respectively. Shown are TspO protein sequences from *B. vulgatus* (WP\_005843416.1), *Bacillus cereus* (GCF80909.1), *Rhodobacter sphaeroides* (AAF24291.1), *Sinorhizobium meliloti* (AAF01195.1), human (NP\_001243460.1), and rat (NP\_036647.1). Secondary structures, cholesterol recognition/interaction amino acid consensus (CRAC) sequence, and critical residues ( $\bullet$ ) from *R. sphaeroides* TspO crystal structure are shown (50). (C) The search

for TspO homologs in the family *Bacteroidales* was accomplished with a BLAST-based approach, using the *Bacillus cereus* copy of TspO (GCF80909.1) as a query against a database of 154 gut-associated *Bacteroidales* genomes, 122 of which are from the genus *Bacteroides*. Genome counts are indicated within categories. (D) Gene tree estimated from TspO sequences across the *Bacteroidales*. All *B. vulgatus* and *B. dorei* genomes included in the search encode *tspO*. Clade for *B. vulgatus* TspO sequences is displayed as a polytomy; all *B. vulgatus* TspO sequences are at least 98% identical to each other. Numbers above branches represent bootstrap values; only bootstraps over 50 shown. The gene tree was estimated using FastTree (51).

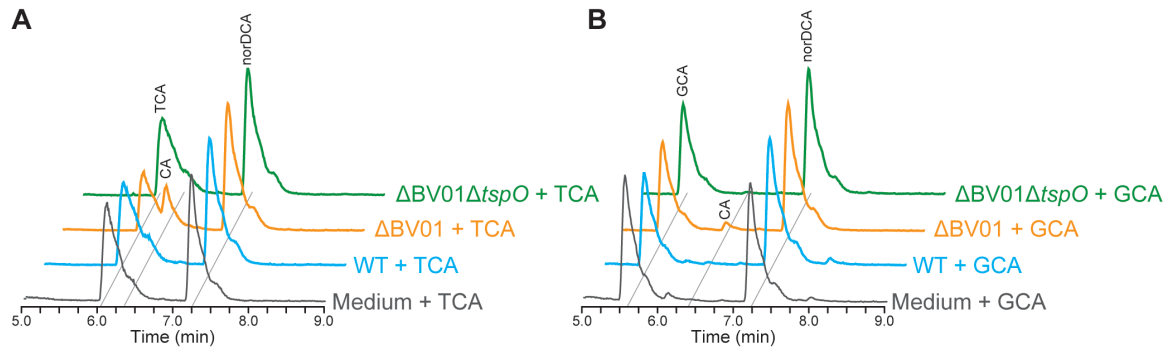

**Figure 5. BV01 alters host interactions with bile acids in a *tspO*-dependent manner. (A)**

Representative LC/MS traces showing *B. vulgatus* deconjugates taurocholic acid (TCA) to cholic acid (CA) in the cured lysogen background ( $\Delta BV01$ ), but little or no activity CA is detectable in the wild-type (WT) or cured lysogen *tspO* deletion ( $\Delta BV01\Delta tspO$ ) backgrounds. *B. vulgatus* cultures were incubated with 50  $\mu M$  TCA for 16 hr prior to bile acid extraction. (B) Representative LC/MS traces showing *B. vulgatus* deconjugates glycocholic acid (GCA) to CA in the  $\Delta BV01$  background, but not in the WT or  $\Delta BV01\Delta tspO$  backgrounds. *B. vulgatus* cultures were incubated with 50  $\mu M$  GCA for 48 hr prior to bile acid extraction. Nordeoxycholic acid (norDCA) was added to a final concentration of 15  $\mu M$  as an internal standard after incubation. Peaks labeled for their metabolites based on m/z; TCA = 514.29, GCA = 464.30, CA = 407.28, norDCA = 377.27.

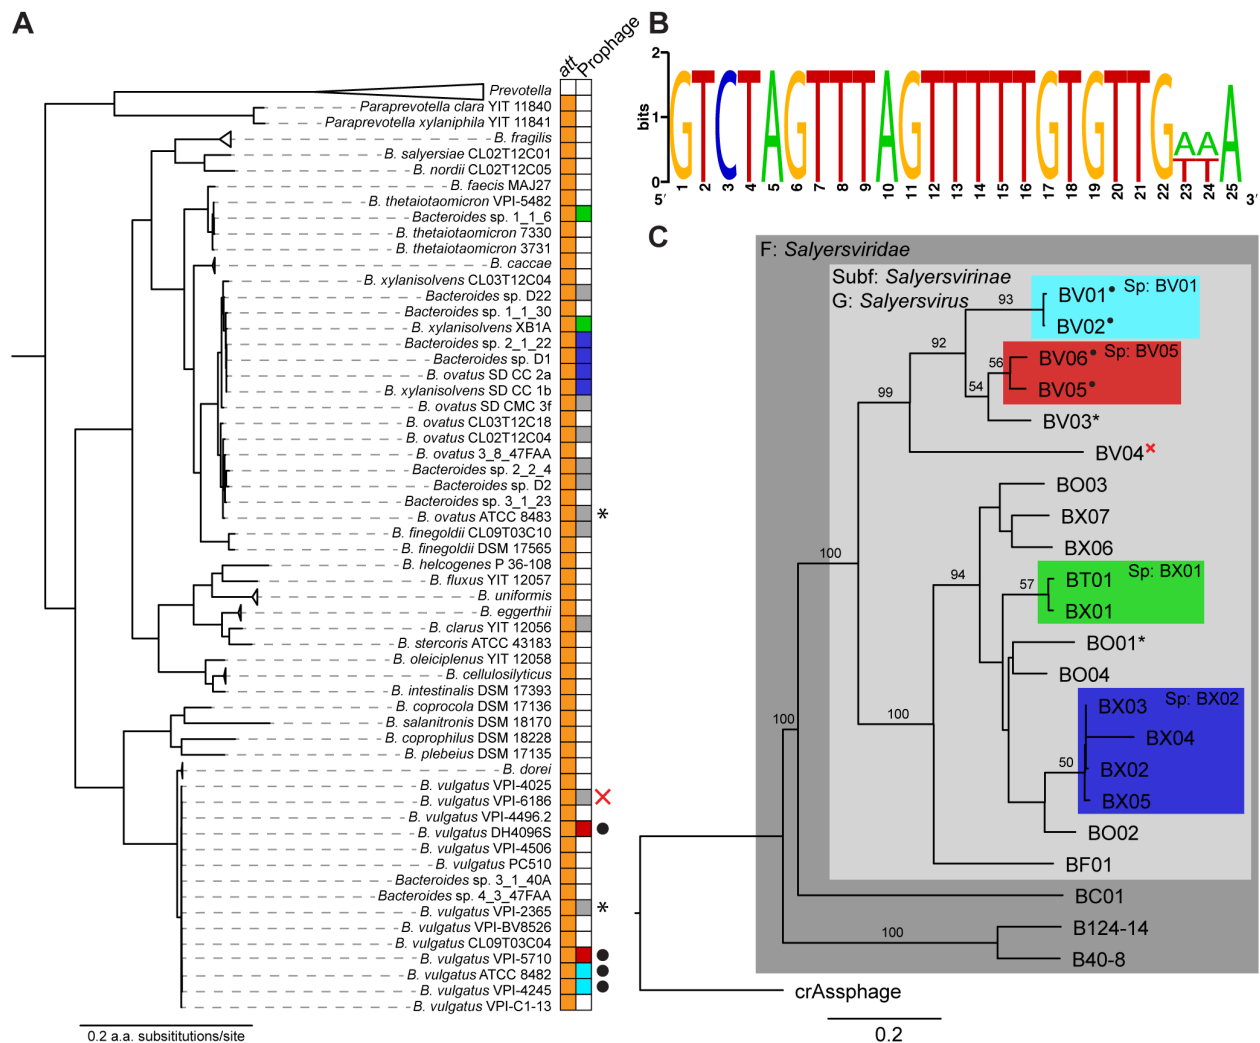

**Figure 6. *Salyersviridae* occur throughout the *Bacteroides* genus.** (A) *Bacteroides* phylogeny and occurrence of *Salyersviridae att* site. All duplications of the *att* site are associated with a putative integrated prophage. Host phylogeny estimated by maximum likelihood from concatenated alignment of 13 core genes. (B) Consensus *att* site for *Salyersvirinae*. The *attP* is duplicated upon integration of a *Salyersvirinae* prophage, resulting in direct repeats. Image made with the WebLogo online tool. (C) Phylogenomic Genome-BLAST Distance Phylogeny implemented with the VCTOR online tool (53) using amino acid data from all phage ORFs. For

consistency, all phage genomes were annotated with MetaGeneAnnotator (54) implemented via VirSorter (55). Support values above branches are GBDP pseudo-bootstrap values from 100 replications. Family (F), subfamily (Subf), genus (G), and species (Sp) assigned by OPTSIL clustering (56) (Table 1). Each leaf of the tree represents a unique phage species, except where indicated by colored boxes. Active prophages confirmed by sequencing and/or PCR indicated with “•”; prophages confirmed to have been inactivated by genome rearrangement indicated with “x”; prophages which were tested for activity with inconclusive results indicated with “\*” (Fig. S4).
